1 **Effects of fasting induced carbohydrate depletion on murine ischemic skeletal**  
2 **muscle function.**

3 Cameron A. Schmidt<sup>1,2</sup>, Emma J. Goldberg<sup>1,2</sup>, Tom D. Green<sup>1,2</sup>, Reema R. Karnekar<sup>1,2</sup>,  
4 Jeffrey J. Brault<sup>1,3</sup>, Spencer G. Miller<sup>3</sup>, Adam J. Amorese<sup>1,2</sup>, Dean J. Yamaguchi<sup>4,5</sup>, Espen  
5 E. Spangenburg<sup>1,2</sup>, Joseph M. McClung<sup>1,2,4\*</sup>

6

7 <sup>1</sup>Dept. of Physiology, Brody School of Medicine, East Carolina University, Greenville,  
8 North Carolina, United States of America

9 <sup>2</sup>East Carolina Diabetes and Obesity Institute, East Carolina University, Greenville, North  
10 Carolina, United States of America

11 <sup>3</sup>Dept. of Kinesiology, College of Health and Human Performance, East Carolina  
12 University, Greenville, North Carolina, United States of America

13 <sup>4</sup>Department of Cardiovascular Sciences, East Carolina University, Greenville, North  
14 Carolina, United States of America

15 <sup>5</sup>Division of Surgery, Brody School of Medicine, East Carolina University, Greenville, North  
16 Carolina, United States of America

17

18 \*Corresponding Author

19 Email: [mcclungj@ecu.edu](mailto:mcclungj@ecu.edu) (J.M.M.)

20

21

22

23 **Abstract**

24 Stored muscle carbohydrate supply and energetic efficiency constrain muscle functional  
25 capacity during exercise and are influenced by common physiological variables (e.g. age,  
26 diet, and physical activity level). Whether these constraints affect overall functional  
27 capacity or the timing of muscle energetic failure during acute ischemia is not known. We  
28 interrogated skeletal muscle contractile properties in two anatomically distinct hindlimb  
29 muscles that have well characterized differences in energetic efficiency (locomotory-  
30 extensor digitorum longus (EDL) and postural- soleus muscles) under conditions of  
31 reduced carbohydrate supply. 180 mins of acute ischemia resulted in complete energetic  
32 failure in all muscles tested, indicated by: loss of force production, substantial reductions  
33 in total adenosine nucleotide pool intermediates, and increased adenosine nucleotide  
34 degradation product - inosine monophosphate (IMP). These changes occurred in the  
35 absence of apparent myofiber structural damage assessed histologically by both  
36 transverse section and whole mount. Restriction of the available intracellular carbohydrate  
37 pool by fasting (~50% decrease in skeletal muscle) did not significantly alter the timing to  
38 muscle functional impairment or affect the overall force/work capacities of either muscle  
39 type. Fasting did cause rapid development of passive tension in both muscle types, which  
40 may have implications for optimal timing of reperfusion or administration of precision  
41 therapeutics.

42

43

44

45

46

47

48

## 49 **Introduction**

50 Ischemic skeletal muscle necrosis occurs concurrently with several common clinical  
51 conditions (e.g. peripheral arterial disease, compartment syndrome, or diabetic necrosis)  
52 and is a complicating factor of successful muscle graft transplantation(1–3). The severity  
53 of necrosis during an ischemic episode has long been considered a sole function of time,  
54 temperature, and magnitude of the hypoxic insult(4,5). However, the timing of the events  
55 that precede irreversible functional impairment and necrosis during ischemia may also  
56 depend on other key variables including: metabolic rate; contractile efficiency; and the size  
57 of the stored carbohydrate pool(4). Carbohydrate metabolism is key, as muscle energy  
58 supply becomes dependent on anaerobic fermentation of stored carbohydrate sources  
59 during ischemia(6–8). Glycogen is the primary storage form of carbohydrate in skeletal  
60 muscle, and its storage/utilization can be influenced by acute environmental factors as  
61 well as chronic diseases(9–14).

62

63 Previous studies have examined the time dependent changes of metabolites and  
64 contractile function in rodent skeletal muscle following ischemia with reperfusion (I/R)(15–  
65 18). Several important observations can be gleaned from these studies: First, locomotory  
66 (fast glycolytic) muscles experienced more damage compared to postural (slow oxidative)  
67 muscles(15,17). Second, The degree of initial injury can have large effects on post  
68 ischemic recovery time(16). Lastly, Optimal reperfusion timing is related to changes in  
69 muscle metabolite levels during ischemia(18). A major limitation of I/R studies is that it is  
70 difficult to distinguish between the functional impairment and/or damage that is attributable  
71 to the ischemia itself versus that caused by the reperfusion injury.

72

73 In a previous study, using an *in vivo* mouse hindlimb ischemia model (without reperfusion),  
74 we found that myonecrosis develops between three and six hours after the onset of

75 ischemia and is accompanied by a complete loss of contractile function(19). This led us  
76 to examine the <3-hour time domain in this study to better characterize the exact temporal  
77 nature of muscle functional impairments and metabolite changes that occur under  
78 ischemic conditions. We hypothesized that reductions in stored muscle glycogen would  
79 significantly shorten the amount of time that the muscles could remain functional during  
80 ischemia. To test this hypothesis, we utilized fasting to induce an approximate 50%  
81 decrease in resting muscle glycogen and employed a carefully controlled experimental  
82 system to assess the effects of carbohydrate depletion on isolated mouse hindlimb muscle  
83 function during severe hypoxia and nutrient deprivation. Our data provide a novel  
84 characterization of ischemic muscle mechanical/energetic failure and paint a detailed  
85 picture of the timing of these impairments. This information will provide a valuable  
86 resource to be used in conjunction with studies of ischemia/reperfusion in mouse hindlimb  
87 ischemia models.

88

## 89 **Materials and Methods**

90

### 91 **Animals**

92 Adult male BALB/c mice (N=32), aged 16-24 weeks old, were obtained from Jackson  
93 Laboratories (Bar Harbor, ME). All work was approved by the Institutional Animal Care  
94 and Use Committee of East Carolina University. Animal care followed the Guide for the  
95 Care and Use of Laboratory Animals, Institute of Laboratory Animal Resources,  
96 Commission on Life Sciences, National Research Council. Washington: National  
97 Academy Press, 1996. Animals had free access to water and food except during fasting  
98 protocols, during which animals had free access to water only.

99

### 100 **Laser scanning confocal and multiphoton microscopy**

101 For microvascular imaging, Dylight 594 conjugated *Griffonia simplicifolia* isolectin B<sub>4</sub> (GS-  
102 IB<sub>4</sub>) (Vector Labs, Burlingame, CA) was injected retro-orbitally one hour prior to sacrifice.  
103 EDL and soleus muscles were dissected, and immersion fixed in 4% paraformaldehyde.  
104 BODIPY and DAPI staining was performed as previously described(20). Sarcomeric actin  
105 staining was performed in PFA fixed whole mount muscles, following permabilization with  
106 30µg/ml saponin, using 200nM Alexa Fluor 488 conjugated phalloidin (Thermo Fisher,  
107 Waltham MA). For NAD(P)H autofluorescence imaging, live muscle was dissected  
108 following sacrifice and mounted at resting length. Live muscles were imaged in a glass  
109 bottom dish in Krebs Ringer solution. All imaging was performed using an Olympus  
110 FV1000 laser scanning confocal microscope (LSCM). Acquisition software was Olympus  
111 FluoView FSW (V4.2). The objective used was 60X oil immersion (NA=1.35, Olympus  
112 Plan Apochromat UPLSAPO60X(F)) or 30X (NA= 1.05, Olympus Plan Apochromat  
113 UPLSAPO30XS). Images were 800x800 pixel with 2µs/pixel dwell time. Detector noise  
114 was reduced by application of a 3X line scanning kalman filter. Images were acquired in  
115 sequential scan mode. 2µM DAPI was used for nuclear counterstaining (Sigma Aldrich,  
116 St. Louis, MO) and was excited using the 405nm line of a multiline argon laser; emission  
117 was filtered using a 490nm dichroic mirror and 430-470nm barrier filter. BODIPY and  
118 AF488-phalloidin were excited using the 488nm line of a multiline argon laser; emission  
119 was filtered using a 560nm dichroic mirror and 505-540nm barrier filter. Dylight 594 (GS-  
120 IB<sub>4</sub>) was excited using a 559nm laser diode; emission was filtered using a 575-675nm  
121 barrier filter. Zero detector offset was used for all images. The pinhole aperture diameter  
122 was set to 105µm (1 Airy disc). NAD(P)H autofluorescence has been shown to be highly  
123 localized to skeletal muscle mitochondria(21). NAD(P)H autofluorescence was excited  
124 using a mode locked pulsed laser (Mai Tai, Spectra Physics, Santa Clara, CA) tuned to  
125 720nm. Emission was collected using separate non-descanned detectors.

126

## 127 **Dystrophin/Laminin immunofluorescence in transverse muscle sections**

128 EDL and soleus muscles were embedded in optimal cutting temperature medium (OCT),  
129 and frozen in liquid nitrogen cooled isopentane for cryosectioning. 10µm sections were  
130 cut using a CM-3050S cryostat (Leica, Wetzlar Germany) and collected on charged glass  
131 slides. Sections were then fixed in 1:1 acetone/methanol for 10 minutes at -20°C,  
132 rehydrated in 1X phosphate buffered saline (PBS), and blocked in 5% goat serum + 1X  
133 PBS for one hour at room temperature. Sections were then incubated with mouse anti-  
134 human monoclonal dystrophin antibody (Thermo-Fisher, MA5-13526), and rabbit anti-rat  
135 primary laminin antibody (Thermo-Fisher, A5-16287) at 4°C overnight. Sections were  
136 washed 3X for 10 minutes with cold 1X PBS and incubated for 1 hour with Alexa-fluor 594  
137 conjugated goat anti-rabbit IgG or Alexa-fluor 488 conjugated goat anti-mouse (highly  
138 cross adsorbed) IgG2b secondary antibody (1:250, Invitrogen). Sections were mounted  
139 using Vectashield hard mount medium without Dapi (Vector Labs). Images were taken  
140 with an Evos FL auto microscope (Thermo Fisher, Waltham, MA) with a plan fluorite 20X  
141 cover slip corrected objective lens (NA = 0.5, air). The following excitation/emission filter  
142 cubes were used: GFP (470/22 nm Excitation; 510/42 nm Emission) and Texas Red  
143 (585/29 nm Excitation; 624/40 nm Emission). 4X and 20X magnification images were  
144 taken for each condition. Image processing was performed using ImageJ (NIH,  
145 v1.51f)(22).

146

## 147 **Fasting**

148 Pilot testing was performed to determine the minimal fasting time to achieve an ~50%  
149 reduction in resting skeletal muscle glycogen(23). Muscle glycogen reached the target  
150 reduction after 24 hours of fasting (one dark cycle).

151

## 152 **Measurement of muscle mechanical function**

153 Mice were sacrificed by cervical dislocation under isoflurane anesthesia (confirmed by  
154 lack of pedal withdrawal reflex). Extensor digitorum longus (EDL) or soleus muscles were  
155 carefully dissected and tied at both tendon ends with 5-0 silk sutures (Thermo Fisher,  
156 Waltham, MA). Muscles were tied to an anchor at the proximal end and a dual mode force  
157 transducer (Aurora 300B-LR, Aurora, ON, Canada) at the distal end in a vertical bath at  
158 22°C. All protocols were performed in the absence of additional carbon fuel sources (i.e.  
159 amino acids, glucose, etc.) to restrict muscles to stored fuel supplies. The bath solution  
160 was a modified Krebs Ringer solution described previously(24). All muscles were  
161 dissected and mounted within 15 mins of sacrifice. Muscles were equilibrated in the bath  
162 for 10 mins, and optimal length ( $L_0$ ) was determined by stimulating twitch contractions  
163 (0.2ms pulse width, 1 pulse/train) at 10 second intervals and adjusting the length  
164 incrementally until maximal force was achieved. Supramaximal stimulation voltage for  
165 both muscle types was determined to be 20V.  $L_0$  (mm) was measured using a digital  
166 microcaliper (Thermo Fisher, Waltham, MA). A force frequency curve was developed for  
167 each muscle using stepwise increasing stimulation frequencies of 10, 20, 40, 60, 80, 100,  
168 and 120 Hz (.2ms pulse width, pulses/train=half of the stim. Freq.). Baths were aerated  
169 with 95% $O_2$ /5% $CO_2$  (oxygenated;  $O_2$  condition) during  $L_0$  determination and the initial  
170 force frequency curve. The aeration source was then either left the same or changed to  
171 95% $N_2$ /5% $CO_2$  (hypoxic;  $N_2$  condition) to simulate ischemia. The muscles were then  
172 equilibrated for 10 mins, and an initial isokinetic contraction protocol was elicited in the  $O_2$   
173 condition (100Hz isometric contraction for 0.8 seconds followed by a 3mm shortening  
174 phase over .3 seconds, then a return to  $L_0$  over 30s for the EDL; for the soleus 80Hz  
175 isometric contraction was elicited for 0.8 seconds followed by a 4mm shortening phase  
176 over .4 seconds, then a return to  $L_0$  over 30s). The aeration source was then either left the  
177 same or changed to 95% $N_2$ /5% $CO_2$  (hypoxic condition), with experimental conditions  
178 alternated each time to reduce bias. The muscles were then equilibrated for 10 mins,

179 followed by stimulated isokinetic contractions every 10 mins for 180 mins (18 total  
180 contractions). We chose this timing based on our previous observation that excitation  
181 contraction coupling is impaired in muscles isolated from BALB/c mice 180 minutes after  
182 induction of acute hindlimb ischemia (in the absence of histological signs of tissue  
183 necrosis)(19). A second force frequency curve was measured following the 180-min.  
184 isokinetic protocol without changing the aeration source. Muscles were removed from the  
185 apparatus, blot dried on paper, weighed, and flash frozen in liquid nitrogen for biochemical  
186 analyses. Isometric time-tension integrals (TTI) were calculated by integrating over the  
187 isometric (phase I) portion of the curve and are expressed in units of N\*s/cm<sup>2</sup>. Isokinetic  
188 work (W) was obtained by integrating the force over the length change during the  
189 shortening (phase II) portion of the protocol and is expressed in units of J/cm<sup>2</sup>.

190

191 Absolute isometric force measurements were normalized to mathematically approximated  
192 cross-sectional areas of the muscles. The cross-sectional area for each muscle was  
193 determined by dividing the mass of the muscle (g) by the product of its optimal fiber length  
194 ( $L_f$ , cm) and estimated muscle density (1.06 g cm<sup>-3</sup>). Muscle force production was  
195 expressed as specific force (N/cm<sup>2</sup>) determined by dividing the tension (N) by the  
196 calculated muscle cross-sectional area.  $L_f$  was obtained by multiplying  $L_0$  by the standard  
197 muscle length to fiber length ratio (0.45 for adult mouse EDL; 0.71 for soleus)(25). A gas  
198 calibrated Clark electrode (Innovative instruments, Lake Park, NC) was used to assess  
199 the oxygen saturation of the isolated bath medium under both aeration conditions prior to  
200 carrying out the experiments. O<sub>2</sub> conditions were approximately 90% saturation measured  
201 at the center of the bath (after 10 mins of aeration). N<sub>2</sub> conditions were <2% saturation.

202

203 **Measurement of glycogen content in whole tissue**



204 Skeletal muscle and liver tissues were flash frozen in liquid nitrogen and stored at -80°C.  
205 Glycogen assays were performed using acid hydrolysis and an enzyme coupled  
206 assay(26). Briefly, tissue samples were digested/hydrolyzed under acidic conditions using  
207 2N hydrochloric acid (Sigma Aldrich, St. Louis, MO) on a heating block at 95°C for 2 hours  
208 with additional vortexing. Samples were neutralized with equal volume 2N sodium  
209 hydroxide (Sigma). A small amount of tris HCl pH 7.0 (~1% of final volume) was added to  
210 buffer the solution. Samples were added to a clear 96 well plate in duplicate and were  
211 incubated with a solution containing: >2000U/L hexokinase (*S. cerevisiae*), >4000 U/L  
212 NAD<sup>+</sup> dependent glucose-6-phosphate dehydrogenase (*L. mesenteroides*), 4mM ATP,  
213 2mM Mg<sup>2+</sup>, and 2mM NAD<sup>+</sup> (Hexokinase reagent solution; Thermo Fisher). Water was  
214 used in place of the reagent for background correction. A standard curve of D-glucose  
215 (Sigma Aldrich) was used to calculate the concentrations of hydrolyzed glucosyl units in  
216 each sample. Colorimetric measurement of NAD(P)H absorbance was made at 340nm  
217 using a Cytation 5 microtiter plate reader (Biotek, Winooski, VT). Liver samples were  
218 diluted 1:50 in water prior to enzyme coupled assays to obtain absorbance values within  
219 the range of the standard curve. Data were normalized to tissue mass and represented  
220 as nmoles glucose/mg tissue wet weight. The response coefficient ( $R_{Glyc}$ ) is defined as the  
221 fractional change in experimental group mean relative to the basal group (i.e. Mean Basal  
222 – Mean Experimental/Mean Basal\*100).

223

#### 224 **Ultra-performance liquid chromatography (UPLC) measurements of adenosine** 225 **nucleotides in whole tissue**

226 UPLC measurements of adenosine nucleotides in whole muscle tissue have been  
227 described in detail previously(27). Briefly, isolated muscles were flash frozen in liquid  
228 nitrogen, homogenized in ice-cold perchloric acid using a glass on glass homogenizer,  
229 and centrifuged to remove precipitated proteins. Samples were neutralized using

230 potassium hydroxide and centrifuged a second time, to remove perchlorate salt.  
231 Adenosine nucleotides and degradation products were assayed using an Acquity UPLC  
232 H class system (Waters, Milford, MA). Metabolites were identified by comparison of peak  
233 retention times of pure, commercially available standards (Sigma–Aldrich). These UPLC  
234 measures can provide an index of intracellular energetic state. The amount of IMP reflects  
235 longer periods of metabolic demand exceeding supply as the available adenylate pool is  
236 decreased via irreversible deamination of AMP to IMP. Over the timeframe of these  
237 stimulation protocols, IMP accumulation is a reliable measure of sustained mismatch  
238 between ATP supply and demand. (Adenosine triphosphate-ATP, adenosine  
239 diphosphate-ADP, adenosine monophosphate-AMP, and inosine monophosphate-IMP).  
240

#### 241 **Statistical Analysis**

242 Results of statistical comparisons are represented by means  $\pm$  standard error (SEM).  
243 Sample variance (in figure panels) is represented by sample standard deviation (SD).  
244 Analyses and plotting were carried out using Graphpad prism (V8.01; Windows 10).  
245 Unpaired two-tailed t-tests were used for between group comparisons. For comparison of  
246 means, p values of  $< 0.05$  were considered statistically significant.

247

#### 248 **Results**

249 Extensor digitorum longus (EDL) and soleus muscles were chosen for their known  
250 differences in thermodynamic efficiency(28). The muscles also characteristically rely on  
251 different modes of energy metabolism (glycolytic and oxidative metabolism  
252 respectively)(29). The specialized nature of each muscle is highlighted for illustrative  
253 purposes by whole mount imaging (**Fig 1**), contrasting the dramatically different  
254 microvascular anatomy, cellular lipid droplet distribution (BODIPY), and mitochondrial  
255 density/distribution (NAD(P)H).

256 **Fig 1: Microanatomy of Extensor digitorum longus (EDL) and soleus muscles differs**  
257 **in several key ways.** Qualitative images highlighting a few of the key anatomical  
258 differences between the fast twitch extensor digitorum longus (EDL) and slow twitch  
259 soleus muscles (A). From left to right: (Left) Vessel density images are z-projections of  
260 Dylight 594 conjugated lectin; (Middle) BODIPY images are z-projections of BODIPY  
261 positive lipid droplets. Red signal in BODIPY images are lectin stained blood vessels. Blue  
262 signal in BODIPY images are myonuclei. Arrows indicate BODIPY positive lipid droplets  
263 in zoomed image inlays; (Right) Mitochondrial NAD(P)H images are optical sections of  
264 reduced pyridine nucleotide autofluorescence in live isolated skeletal muscle. NAD(P)H  
265 fluorescence intensity is mapped onto the image (highest intensity in white). Scale bars  
266 are 25um.

267

268 Fasting is a well characterized and effective method of whole body carbohydrate depletion  
269 in mice, due to their high thermal conductivity and large surface area to body volume  
270 ratio(23). This method was chosen for this study because it is independent of the  
271 confounding effects of exercise or contraction induced fatigue(30). The mean change in  
272 bodyweight over the fasted period (24 hours) was  $3.9 \pm 0.12$  grams, approximately 13%  
273 of the mean initial weight. We observed a large difference in stored glycogen levels  
274 between fed and fasted groups in both liver (~90% lower) (**Table 1**) and skeletal muscle  
275 (~50% lower) (**Table 1**). Interestingly, the resting glycogen concentration was higher in  
276 the soleus than the EDL under both fed and fasted conditions. Additionally, soleus  
277 muscles had a lower mean glycogen concentration in the fasted group relative to the fed  
278 state (mean percent difference of 41.6% compared to 56.1% in the EDL groups; **Table 1**).

279

280

281 **Table 1: Basal tissue glycogen concentrations in the liver and skeletal muscle of fed Vs. fasted**  
282 **groups.**

| <b>Tissue</b> | <b>Condition</b> | <b>Glycogen<br/>(nmol/mg)</b> | <b>StDev<br/>(nmol/mg)</b> | <b>% Fed Group</b> |
|---------------|------------------|-------------------------------|----------------------------|--------------------|
| Liver         | Fed              | 387.9*                        | 88.43                      |                    |
|               | Fasted           | 42.0*                         | 20.7                       | 10.8               |
| EDL           | Fed              | 34.4*#                        | 8.0                        |                    |
|               | Fasted           | 19.3*#                        | 3.2                        | 56.1               |
| Soleus        | Fed              | 61.9*#                        | 17.5                       |                    |
|               | Fasted           | 25.8*#                        | 3.6                        | 41.6               |

283 Units are nanomoles hydrolyzed glucosyl units/milligram tissue wet weight (nmol/mg). \*p<.05 Fed  
284 V. Fasted Groups. #p<.05 EDL V. Sol. N=4. Sample standard deviation (StDev).

285

286 Fasting had no effect on the isometric force-frequency relationship at baseline or under  
287 any of the tested conditions in the EDL (**Fig 2A**) or soleus (**Fig 2B**), indicating reduced  
288 carbohydrate pool size did not alter excitation-contraction coupling. Specific force values  
289 for both muscles were consistent with those obtained previously(24). Additionally, we  
290 observed characteristic reductions in maximal specific force following the O<sub>2</sub> protocols  
291 (and completely impaired force production following the N<sub>2</sub> protocols) in both muscles (**Fig**  
292 **2A,B**). Notably, the isometric force capacity during each protocol did not differ between  
293 the fed and fasted groups in either the EDL (**Fig 2C**) or the soleus (**Fig 2D**). Similarly, the  
294 work capacity over the course of the protocols did not differ for either muscle between the  
295 fed and fasted states (**Fig 2E,F**). As expected, the force and work capacities were greatly  
296 reduced under the N<sub>2</sub> conditions compared to O<sub>2</sub> conditions.

297

298 **Fig 2: Effects of carbohydrate depletion on excitation-contraction coupling and**  
299 **force/work capacities.** Specific force-frequency curves for EDL (A) and soleus (B). Basal  
300 conditions are 95% O<sub>2</sub> prior to isokinetic protocol. (C,D) Specific force capacities were  
301 obtained by summing the isometric portion of the time-tension integrals at each sampling  
302 interval for the EDL and soleus respectively. (E,F) Specific work capacities were obtained  
303 by summing the isovelocity (shortening) portion of the length-tension integrals at each  
304 sampling interval for the EDL and soleus. N=8/treatment/group. Data are presented as  
305 mean ± SD. \*p<.05 O<sub>2</sub> Vs. N<sub>2</sub> (Vs. Basal A,B).

306

307

308 Given that no substantial differences in force or work capacities were observed, we next  
309 examined whether the timing of muscle functional impairments would differ between the  
310 fed and fasted states. The time-tension integral (TTI) of the isometric portion of each  
311 contraction was plotted as a function of the number of contractions (or time) during each  
312 protocol for the EDL (**Fig 3A**) and soleus (**Fig 3B**). This measurement represents the  
313 ability of the muscle to perform sustained non-shortening contractions. Additionally, the  
314 length-time integral of the isokinetic portion of each contraction was also plotted against  
315 the number of contractions for the EDL (**Fig 3C**) and soleus (**Fig 3D**). This measurement  
316 represents the ability of the muscle to perform shortening work. Both sets of curves were  
317 characterized by an inverse linear relationship under O<sub>2</sub> conditions and a distinctly non-  
318 linear inverse relationship under N<sub>2</sub> conditions during the time and frequency domains of  
319 the experiments. The muscles from the fasted group experienced more rapid reduction in  
320 both TTI and work. All the tested muscles, however, experienced full impairment (defined  
321 as force or work output <10% of the initial value) within a relatively small (~10-20 min.)  
322 window of time. Passive tension was measured at the start of each contraction for the EDL  
323 (**Fig 3E**) and soleus (**Fig 3F**). This measurement represents stiffening of the muscle, which

324 may be due to several possible factors, including impaired calcium reuptake or cellular  
325 swelling due to uncontrolled fluid uptake(31). None of the muscles experienced substantial  
326 changes in passive tension during the O<sub>2</sub> protocol. Large increases in passive tension  
327 occurred in both muscles under N<sub>2</sub> conditions. Interestingly, passive tension development  
328 occurred earlier in the fasted groups (**Fig 3E,F**). To account for the possibility that the  
329 muscles were accumulating excessive water, the wet weights of the EDL (**Fig 3G**) and  
330 soleus (**Fig 3H**) were plotted. No differences in wet weight between the fed and fasted  
331 states were observed in either muscle, and all the tested muscles accumulated additional  
332 weight following the N<sub>2</sub> protocol.

333

334 **Fig 3: Effects of carbohydrate depletion on the timing of functional impairment**  
335 **during ischemia.** Isometric time-tension integrals (TTI) of each contraction over the  
336 course of 18 contractions (or 180 minutes) under each condition for the EDL (A) and  
337 soleus (B). Isokinetic length-tension integrals (isokinetic work) of each contraction for the  
338 EDL (C) and soleus (D). Developed passive tension (measured at the start of each  
339 contraction) for the EDL (E) and soleus (F). Muscle wet weights obtained at the end of  
340 each protocol for the EDL (G) and soleus (H). N=8/treatment/group. Data are presented  
341 as mean ± SD.

342

343 We next measured the muscle glycogen levels following the O<sub>2</sub> and N<sub>2</sub> protocols. The N<sub>2</sub>  
344 protocol reduced glycogen concentrations in all the muscles tested, relative to the O<sub>2</sub>  
345 condition (**Table 2**). Additionally, glycogen concentrations were lower in the fasted soleus  
346 groups compared to the fed groups under both O<sub>2</sub> and N<sub>2</sub> conditions (**Table 2**). However,  
347 glycogen concentrations did not differ between fed and fasted groups in the EDL muscles.  
348 Using the response coefficient (R<sub>Glyc</sub>), allowed for comparison of each group mean to the

349 basal values that are presented in **Table 1**. The patterns among both muscle types were  
 350 similar when represented this way. The largest differences observed were between O<sub>2</sub>  
 351 and N<sub>2</sub> conditions and were not substantially different between fed and fasted groups.  
 352 Interestingly, the smallest difference in glycogen concentration observed was in the fasted  
 353 O<sub>2</sub> condition for each muscle. This observation indicates the use of alternative (oxygen  
 354 dependent) fuel sources.

355

356 **Table 2: Tissue glycogen concentrations in EDL and soleus muscles of fed V. fasted mice**  
 357 **following O<sub>2</sub> or N<sub>2</sub> protocols.**

| Tissue | Group  | Condition      | Glycogen(nmol/mg) | StDev(nmol/mg) | R <sub>Glyc</sub> (%) |
|--------|--------|----------------|-------------------|----------------|-----------------------|
| EDL    | Fed    | O <sub>2</sub> | 22.4†             | 4.4            | -34.8                 |
|        |        | N <sub>2</sub> | 7.9†              | 5.1            | -77.0                 |
|        | Fasted | O <sub>2</sub> | 18.8†             | 7.3            | -2.5                  |
|        |        | N <sub>2</sub> | 7.6†              | 1.3            | -60.6                 |
| Soleus | Fed    | O <sub>2</sub> | 42.1†*            | 6.6            | -31.9                 |
|        |        | N <sub>2</sub> | 29.0†*            | 1.6            | -53.1                 |
|        | Fasted | O <sub>2</sub> | 23.5†*            | 8.8            | -8.9                  |
|        |        | N <sub>2</sub> | 9.8†*             | 4.2            | -62.0                 |

358 Units are nanomoles hydrolyzed glucosyl units/milligram tissue wet weight (nmol/mg). The  
 359 Response Coefficient (R<sub>Glyc</sub><sup>-</sup>) indicates the percent change relative to the baseline group means

360 (Presented in Table 1). Sample standard deviation (StDev). \* $p < .05$  Fed V. Fasted Groups. † $p < .05$   
361 O<sub>2</sub> V. N<sub>2</sub> Groups. N=4.

362

363 Total adenosine nucleotide (TAN) concentrations were examined as a measure of the  
364 aggregate tissue energetic state at the end of each protocol. Reductions in the  
365 concentrations of the total adenosine nucleotide pool, and accumulation of IMP, are  
366 measures of the muscles' inability to resynthesize ATP(27). Following the O<sub>2</sub> protocol, the  
367 TAN pool decreased slightly in both EDL (**Fig 4C**) and soleus (**Fig 4D**) muscles compared  
368 to our reported baseline values (**Fig 4 A,B**), but did not differ between fed and fasted  
369 groups. Following N<sub>2</sub> protocols, there were large decreases in the TAN pool in both the  
370 EDL (**Fig 4E**) and soleus (**Fig 4F**), with accompanying increases in the tissue IMP  
371 concentrations (**Fig 4G,H**). However, no substantial differences were observed between  
372 the fed and fasted groups for either muscle type.

373

374 **Fig 4: Metabolic characteristics of isolated EDL and soleus muscles under limiting**  
375 **conditions of resting glycogen and oxygen availability.** Total adenosine nucleotide  
376 concentrations at baseline for the EDL (A) and soleus (B). TAN concentrations following  
377 the 180 min. protocol in 95% O<sub>2</sub> for the EDL (C) and soleus (D). TAN concentrations  
378 following the 180 min. protocol in 95% N<sub>2</sub> (E,F). IMP accumulation after each protocol,  
379 compared across all three conditions for the EDL (G) and soleus (H).  
380 N=4/treatment/group. Data are presented as mean  $\pm$  SD. \* $p \leq .05$  O<sub>2</sub> V. N<sub>2</sub> (V. Basal)  
381 Groups.

382

383 Previous reports have indicated that dystrophin IF staining is rapidly reduced in skeletal  
384 and cardiac muscle during early myonecrosis(19,32). Immunofluorescent staining for the



385 sarcolemmal protein dystrophin and the extracellular matrix protein laminin was performed  
386 on a subset of transverse sectioned muscles to assess the possibility that muscles were  
387 incurring damage during the contraction protocols. No apparent changes were observed  
388 in the EDL (**Fig 5A**) or soleus (**Fig 5C**) under O<sub>2</sub> or N<sub>2</sub> conditions, indicating that the muscle  
389 tissue remained intact during the experiments. Degradation of myofibrillar structures are  
390 another well characterized indicator of myonecrosis development(33). Parallel  
391 assessments were made to accompany the dystrophin/laminin stain. Fibrous actin was  
392 stained in fixed whole mount muscle specimens utilizing optical sectioning to assess the  
393 intramyofibrillar-IMF and perinuclear-PN regions of the myofibers at baseline and following  
394 the N<sub>2</sub> protocol in the EDL (**Fig 5B**) and soleus (**Fig 5D**). Together these assessments did  
395 not reveal any qualitative indication of damage.

396

397 **Fig 5: Assessment of structural integrity of the muscles following experimental**  
398 **protocols.** To control for the possibility that the muscles were structurally damaged during  
399 the contraction protocols, we performed immunofluorescence against sarcolemmal and  
400 extracellular matrix proteins. Image panels of dystrophin (green), and laminin (red) stained  
401 transverse EDL (A) and soleus (C) muscle sections under each of the conditions tested.  
402 Sarcomeric actin was stained using phalloidin (Cyan) in fixed/permeabilized whole mount  
403 muscles at baseline or following 180 mins of severe hypoxia (95% N<sub>2</sub>); EDL (B) and soleus  
404 (D). Optical sectioning facilitated imaging in the intra-myofibrillar (IMF) and perinuclear  
405 (PN) regions of the muscle fibers. Scale bars are 1000µm (A, B Left Panel), 200 µm (A,B  
406 right panels), and 25 µm (B,D).

407

408

409 **Discussion**

410 Skeletal muscle is among the most metabolically dynamic tissues in the body, and is  
411 capable of sustaining a 100-fold change in ATP utilization rate during contraction(34). The  
412 total cost of ATP during contraction is proportional to the duration, intensity, and type (i.e.  
413 shortening vs. non-shortening)(35). Glycogen is the primary storage form of glucose in  
414 skeletal muscle, and is a major source of fuel during most forms of muscle activity(36).  
415 Importantly, glycogen is also the primary source of stored fuel utilized to regenerate ATP  
416 via substrate level phosphorylation in anaerobic glycolysis during severe hypoxia(35).  
417 Depletion of stored muscle glycogen by fasting or exhaustive exercise results in impaired  
418 fatigue resistance and recovery in isolated rodent muscles under normoxic conditions(36–  
419 38). Under ischemic conditions, this effect would be expected to lead to cumulative  
420 reductions in energetic capacity due to the inability to resynthesize ATP and phospho-  
421 creatine (PCr) that is used in support of contraction or resting metabolic processes.  
422 Overnight fasting in rodents results in more dramatic metabolic effects than human  
423 overnight fasting, but induces experimentally reproducible reductions in systemic  
424 carbohydrate stores that are similar to more extreme physiological conditions such as  
425 hyperinsulinemia, hypoglycemia, or post exercise recovery(11,14,23,39). We were  
426 somewhat surprised to find that dramatically reduced muscle glycogen levels had no  
427 substantial effect on the timing or magnitude of muscle functional impairment under  
428 ischemic conditions. Our findings indicate that both muscle types retain a large pool of  
429 stored glycogen that is non-essential for reserve mechanical force production during  
430 hypoxia. It is not clear what the reserve glycogen pool contributes to *in vivo* during fasting.  
431 Future studies could be directed to investigate its' potential involvement in the  
432 maintenance of systemic glucose homeostasis through the production of free amino acids  
433 (i.e. alanine and glutamine) or lactate which can be converted to glucose in the  
434 liver(40,41).

435

436 In mouse EDL and soleus muscles, as much as 50% of the resting metabolic rate has  
437 been attributed to maintenance of intracellular calcium homeostasis(42). We observed a  
438 rapid increase in passive tension development in the fasted group relative to the fed group  
439 under N<sub>2</sub> conditions in both muscle types. The observed increase in the rate of passive  
440 tension development was the only measurement that was substantially different between  
441 the fed and fasted groups. This phenomenon is most likely indicative of progressive  
442 impairment of calcium handling as the capacity for ATP re-synthesis was gradually  
443 depleted(27). This effect may have implications for reperfusion timing, as it has been noted  
444 that calcium handling impairment prior to reperfusion is associated with poor salvage  
445 outcomes(4,43).

446 The dynamic requirements of ATP during muscle contraction require a similarly dynamic  
447 supply of carbon fuel sources that are derived from both blood and intracellular stores.  
448 Physiological and anatomical adaptations (i.e. capillary density, size of stored energy  
449 substrate pools, and mitochondrial density/function) are known to facilitate large  
450 differences in capacity for spontaneous vs. sustained exercise in different species(44).  
451 Similar adaptive differences are highlighted in the distinct microanatomical differences of  
452 mouse locomotory EDL and postural soleus muscles. These adaptive differences,  
453 combined with their similar size and relatively homogeneous fiber type compositions,  
454 make these muscles excellent candidates for comparative studies of muscle energy  
455 metabolism.

456 Skeletal muscle fiber types are categorized by a range of intrinsic metabolic and  
457 mechanical properties(45). Human muscles are generally of mixed fiber type, but mouse  
458 muscles consist of more homogeneous fiber type distributions, making them a practical  
459 model for studying fiber type specific effects (soleus: 1:1 slow type I/fast type IIa; EDL: 9:1  
460 fast type IIb/fast type IIa)(29,46). At face value, it may seem intuitive that fast glycolytic

461 fiber types would be better suited to performance during hypoxia due to their preference  
462 for stored carbohydrate dependent energy metabolism(36,37,47). However, several  
463 studies have indicated a high degree of sensitivity of fast glycolytic muscles to  
464 ischemia/reperfusion injury(16,17,48). One important contributing factor to this effect is an  
465 energetic inefficiency of contraction due to interactions at the level of the acto-myosin  
466 crossbridges(28,49). In the present study, we observed that Soleus muscles stored more  
467 glycogen at baseline, had greater specific force/work capacities, and produced absolute  
468 force for a longer period during ischemia compared to EDL muscles. These observations  
469 are consistent with previous reports(48,50). Though the absolute differences in glycogen  
470 concentrations between groups were larger in the soleus compared to the EDL, the  
471 response coefficient ( $R_{Glyc}$ ) which facilitates interpretation of group differences relative to  
472 their baseline concentration, indicated that the patterns of utilization were not different  
473 between the two types of muscles. We interpret these findings to mean that the greater  
474 basal glycogen concentration observed in the soleus muscles was likely not the primary  
475 factor underlying it's enhanced ischemic mechanical performance.

476

#### 477 **Conclusion**

478 Investigating the key factors that affect the timing of muscle energetic failure during  
479 ischemia will aid in identifying optimal windows for therapeutic intervention. We predicted  
480 that the amount of stored carbohydrate is one such factor, as it is a major contributor to  
481 anaerobic energy metabolism and is influenced by several physiologically relevant  
482 conditions. We conclude that mouse hindlimb muscles maintain a large pool of stored  
483 carbohydrate that is utilized during fasting but does not contribute substantially to the  
484 timing of functional decline during acute ischemia. The carbohydrate lowering effects of  
485 fasting did not substantially affect the total capacity or timing of contractile function  
486 impairment in either muscle type. However, fasting did result in substantial increases in

487 early passive tension development, which may have implications for the timing of  
488 reperfusion or therapeutic administration. We also found that soleus muscles maintained  
489 a greater total force capacity and became impaired more slowly than EDL muscles,  
490 independent of glycogen utilization during the experimental period. This finding supports  
491 several previous observations and bolsters the notion that susceptibility to acute ischemic  
492 injury is not uniform across muscle types.

493

494 **References:**

- 495 1. Liu J, Saul D, Böker KO, Ernst J, Lehman W, Schilling AF. Current Methods for  
496 Skeletal Muscle Tissue Repair and Regeneration. *Biomed Res Int.* 2018;2018:1–  
497 11.
- 498 2. Dolan NC, Liu K, Criqui Michael H, Greenland P, Guralnik Jack M, Chan C, et al.  
499 Peripheral artery disease, diabetes, and reduced lower extremity functioning.  
500 *Diabetes Care.* 2002;25(1):113–20.
- 501 3. Callum K, Bradbury A. ABC of arterial and venous disease: Acute limb ischaemia.  
502 *BMJ.* 2000;320(7237):764–7.
- 503 4. Paradis S, Charles A-L, Meyer A, Lejay A, Scholey JW, Chakfé N, et al.  
504 Chronology of mitochondrial and cellular events during skeletal muscle ischemia-  
505 reperfusion. *Am J Physiol - Cell Physiol.* 2016;310(11):C968–82.
- 506 5. Petrusek PF, Homer-Vanniasinkam S, Walker PM. Determinants of ischemic  
507 injury to skeletal muscle. *J Vasc Surg.* 1994;19(4):623–31.
- 508 6. Jansson E, Johansson J, Sylven C, Kaijser L. Calf muscle adaptation in  
509 intermittent claudication. Side-differences in muscle metabolic characteristics in  
510 patients with unilateral arterial disease. *Clin Physiol.* 1988;8(1):17–29.
- 511 7. Theodore Kalogeris, Christopher P. Baines, Maiké Krenz RJK. Cell Biology of  
512 Ischemia/Reperfusion Injury. *Int Rev Cell Mol Biol.* 2012;298:229–317.

- 513 8. Spriet LL, Soderlund K, Bergstrom M, Hultman E. Anaerobic energy release in  
514 skeletal muscle during electrical stimulation in men. *J Appl Physiol.*  
515 1987;62(2):611–5.
- 516 9. Damsbo P, Vaag A, Hother-Nielsen O, Beck-Nielsen H. Reduced glycogen  
517 synthase activity in skeletal muscle from obese patients with and without Type 2  
518 (non-insulin-dependent) diabetes mellitus. *Diabetologia.* 1991;34(4):239–45.
- 519 10. Bergstrom J, Hermansen L, Hultman E, Saltin B. Diet, Muscle Glycogen and  
520 Physical Performance. *Acta Physiol Scandanavia.* 1967;(71):140–50.
- 521 11. Vollestad NK, Blom C. Effect of varying intensity on glyocgen depletion in human  
522 muscle fibres. *Acta Physiol Scand.* 1985;125:395–405.
- 523 12. Askew CD, Green S, Walker PJ, Kerr GK, Green AA, Williams AD, et al. Skeletal  
524 muscle phenotype is associated with exercise tolerance in patients with peripheral  
525 arterial disease. *J Vasc Surg.* 2005;41(5):802–7.
- 526 13. McGuigan MR, Bronks R, Newton RU, Sharman MJ, Graham JC, Cody D V, et al.  
527 Muscle fiber characteristics in patients with peripheral arterial disease. *Med Sci*  
528 *Sports Exerc.* 2001;33(12):2016–21.
- 529 14. Cohen N, Rossetti L, Shlimovich P, Halberstam M, Hu M, Shamon H.  
530 Counterregulation of hypoglycemia: Skeletal muscle glycogen metabolism during  
531 three hours of physiological hyperinsulinemia in humans. *Diabetes.*  
532 1995;44(4):423–30.
- 533 15. Woitaske MD, McCarter RJ. Effects of fiber type on ischemia-reperfusion injury in  
534 mouse skeletal muscle. Vol. 102, *Plastic and reconstructive surgery.* 1998. p.  
535 2052–63.
- 536 16. Vignaud A, Hourde C, Medja F, Agbulut O, Butler-Browne G, Ferry A. Impaired  
537 skeletal muscle repair after ischemia-reperfusion injury in mice. *J Biomed*  
538 *Biotechnol.* 2010;2010.

- 539 17. Chan RK, Austen WG, Ibrahim S, Ding GY, Verna N, Hechtman HB, et al.  
540 Reperfusion injury to skeletal muscle affects primarily type II muscle fibers. *J Surg*  
541 *Res.* 2004;122(1):54–60.
- 542 18. Ildstrom J, Soussi B, Elander A, Bylund-Fellenius A. Purine metabolism after in  
543 vivo ischemia and reperfusion in rat skeletal muscle. *Am Physiol Soc.*  
544 1990;258(6):1668–73.
- 545 19. Schmidt CA, Amorese AJ, Ryan TE, Goldberg EJ, Tarpey MD, Green TD, et al.  
546 Strain-Dependent Variation in Acute Ischemic Muscle Injury. *Am J Pathol.* 2018  
547 May 1;188(5):1246–62.
- 548 20. Spangenburg EE, Pratt SJP, Wohlers LM, Lovering RM. Use of BODIPY  
549 (493/503) to visualize intramuscular lipid droplets in skeletal muscle. *J Biomed*  
550 *Biotechnol.* 2011;
- 551 21. Rothstein EC, Carroll S, Combs CA, Jobsis PD, Balaban RS. Skeletal muscle  
552 NAD(P)H two-photon fluorescence microscopy in vivo: Topology and optical inner  
553 filters. *Biophys J.* 2005;88(3):2165–76.
- 554 22. Schneider CA, Rasband WS, Eliceiri KW. NIH Image to ImageJ: 25 years of  
555 image analysis. *Nat Methods.* 2012 Jun;9(7):671–5.
- 556 23. Jensen TL, Kiersgaard MK, Sørensen DB, Mikkelsen LF. Fasting of mice: A  
557 review. *Lab Anim.* 2013;47(4):225–40.
- 558 24. Tarpey MD, Amorese AJ, Balestrieri NP, Ryan TE, Schmidt CA, McClung JM, et  
559 al. Characterization and utilization of the flexor digitorum brevis for assessing  
560 skeletal muscle function. *Skelet Muscle.* 2018;8(1):1–15.
- 561 25. Barton ER, Lynch G, Khurana TS, Grange RW, Raymackers J-M, Dorchies O, et  
562 al. Measuring isometric force of isolated mouse muscles in vitro. *Exp Protoc DMD*  
563 *Anim Model Treat-NMD Neuromuscul Network.* 2008;1(2):14.
- 564 26. Passonneau J V, Lauderdale VR. A Comparison of Three Methods of Glycogen

- 565 Measurement in Tissues. *Anal Biochem.* 1974;60(2):405–12.
- 566 27. Brault JJ, Pizzimenti NM, Dentel JN, Wiseman RW. Selective inhibition of ATPase  
567 activity during contraction alters the activation of p38 MAP kinase isoforms in  
568 skeletal muscle. *J Cell Biochem.* 2013;114(6):1445–55.
- 569 28. Barclay CJ. The basis of differences in thermodynamic efficiency among skeletal  
570 muscles. *Clin Exp Pharmacol Physiol.* 2017;44(June):1279–86.
- 571 29. Augusto V, Padovani CR, Eduardo G, Campos R. Skeletal Muscle Fiber Types in  
572 C57Bl6J Mice. *Braz J Morphol Sci.* 2004;21(2):89–94.
- 573 30. Jennische E. Ischaemia Induced Injury in Glycogen-Depleted Skeletal Muscle.  
574 Selective Vulnerability of FG Fibres. *Acta Physiol Scandania.* 1985;125:727–34.
- 575 31. Law DJ. Myofibrils Bear Most of the Resting Tension in Frog Skeletal Muscle.  
576 *Science (80- ).* 1985;230:1280–2.
- 577 32. Armstrong SC, Latham CA, Shivell CL, Ganote CE. Ischemic Loss of  
578 Sarcolemmal Dystrophin and Spectrin: Correlation with Myocardial Injury. *J Mol*  
579 *Cell Cardiol.* 2001;33(6):1165–79.
- 580 33. Fielding RA, Manfredi TJ, Ding W, Fiatarone MA, Evans WJ, Cannon JG. Acute  
581 phase response in exercise. III. Neutrophil and IL-1 beta accumulation in skeletal  
582 muscle. *Am Physiol Soc.* 1993;265(1):166–72.
- 583 34. Weibel ER. Exercise-induced maximal metabolic rate scales with muscle aerobic  
584 capacity. *J Exp Biol.* 2005;208(9):1635–44.
- 585 35. Barclay CJ. Energetics of contraction. *Compr Physiol.* 2015;5(2):961–95.
- 586 36. Allen DG, Lamb GD, Westerblad H. Skeletal Muscle Fatigue : Cellular  
587 Mechanisms. *Physiol Rev.* 2008;88:287–332.
- 588 37. Chin ER, Allen DG. Effects of reduced muscle glycogen concentration on force,  
589 Ca<sup>2+</sup>release and contractile protein function in intact mouse skeletal muscle. *J*  
590 *Physiol.* 1997;498(1):17–29.



- 591 38. Ørtenblad N, Westerblad H, Nielsen J. Muscle glycogen stores and fatigue. J  
592 Physiol. 2013;591(18):4405–13.
- 593 39. Adeva-Andany MM, González-Lucán M, Donapetry-García C, Fernández-  
594 Fernández C, Ameneiros-Rodríguez E. Glycogen metabolism in humans. BBA  
595 Clin. 2016;5:85–100.
- 596 40. Garber A, Karl I, Kipnis D. Alanine and Glutamine Synthesis and Release from  
597 Skeletal Muscle I. J Biol Chem. 1976;251(3):836–43.
- 598 41. Garber A, Karl I, Kipnis D. Alanine and Glutamine Synthesis and Release from  
599 Skeletal Muscle II. J Biol Chem. 1976;251(3):836–43.
- 600 42. Smith IC, Bombardier E, Vigna C, Tupling AR. ATP Consumption by  
601 Sarcoplasmic Reticulum Ca<sup>2+</sup> Pumps Accounts for 40-50% of Resting Metabolic  
602 Rate in Mouse Fast and Slow Twitch Skeletal Muscle. PLoS One. 2013;8(7):1–11.
- 603 43. Walker PM. Ischemia/Reperfusion Injury in Skeletal Muscle. Ann Vasc Surg.  
604 1991;5(4):399–402.
- 605 44. Weibel ER, Taylor CR, Weber JM, Vock R, Roberts TJ, Hoppeler H. Design of the  
606 oxygen and substrate pathways. VII. Different structural limits for oxygen and  
607 substrate supply to muscle mitochondria. J Exp Biol. 1996;199:1699–709.
- 608 45. Saltin B, Gollnick PD. Skeletal Muscle Adaptability: Significance for Metabolism  
609 and Performance. Skelet Muscle. 1983;10:555–631.
- 610 46. Simoneau J, Bouchard C. Human variation in skeletal muscle fiber-type proportion  
611 and enzyme activities. Am J Physiol .... 1989;257(4):567–72.
- 612 47. Westerblad H, Allen DG, Bruton JD, Andrade FH, Lännergren J. Mechanisms  
613 underlying the reduction of isometric force in skeletal muscle fatigue. Acta Physiol  
614 Scand. 1998;162(3):253–60.
- 615 48. Howlett RA, Hogan MC. Effect of hypoxia on fatigue development in rat muscle  
616 composed of different fibre types. Exp Physiol. 2007;92(5):887–94.

- 617 49. Barclay CJ, Constable JK, Gibbs CL. Energetics of fast- and slow- twitch muscles  
618 of the mouse. J Physiol. 1993;472:61–80.
- 619 50. Bonen A, Mcdermott J, Tan M. Glycogenesis and Glyconeogenesis in Skeletal:  
620 Effects of pH and Hormones. Am J Physiol - Endocrinol Metab. 1990;258(4):693–  
621 700.
- 622
- 623
- 624
- 625
- 626
- 627
- 628
- 629
- 630
- 631
- 632
- 633
- 634
- 635
- 636
- 637
- 638
- 639
- 640
- 641
- 642

643

644

645

646

647

648

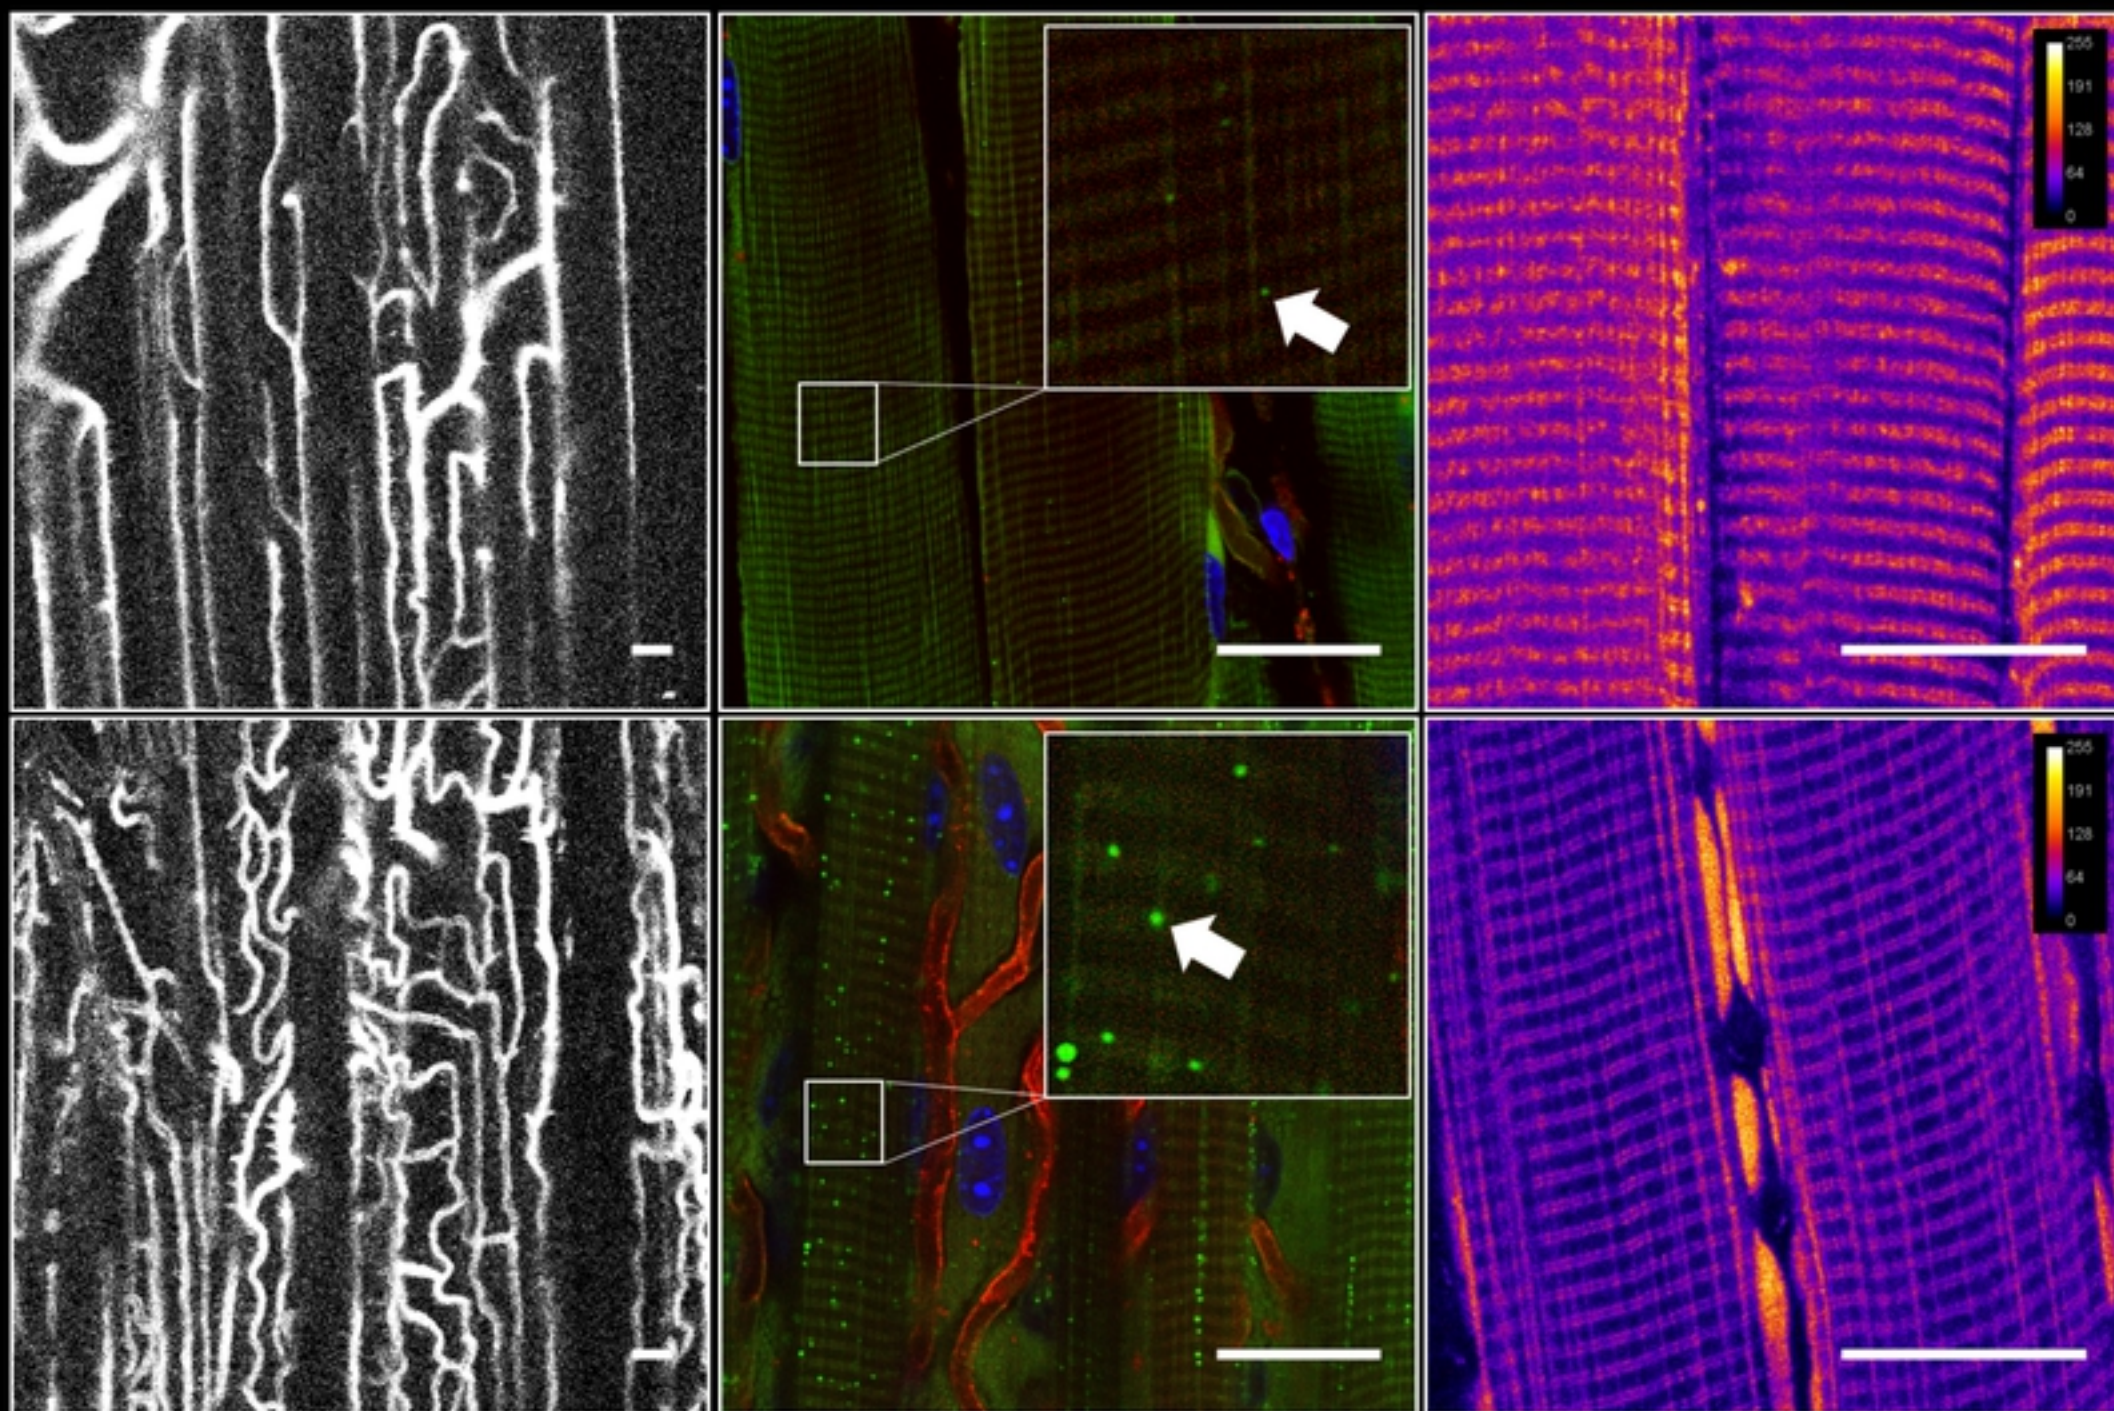

Figure 1

**EDL****Soleus**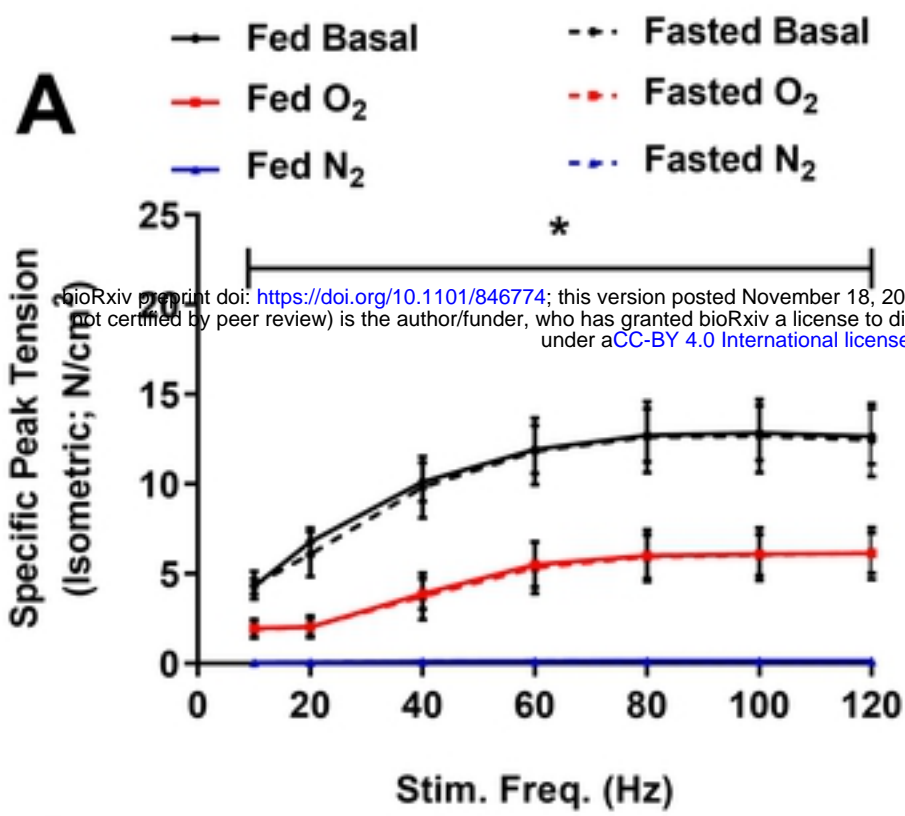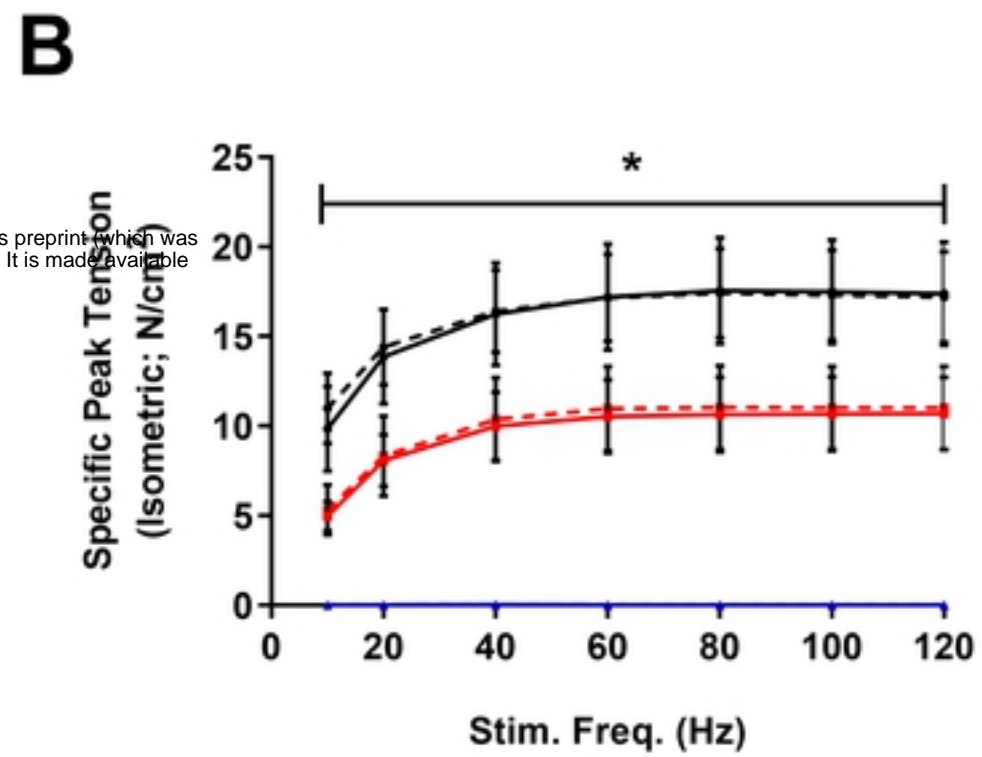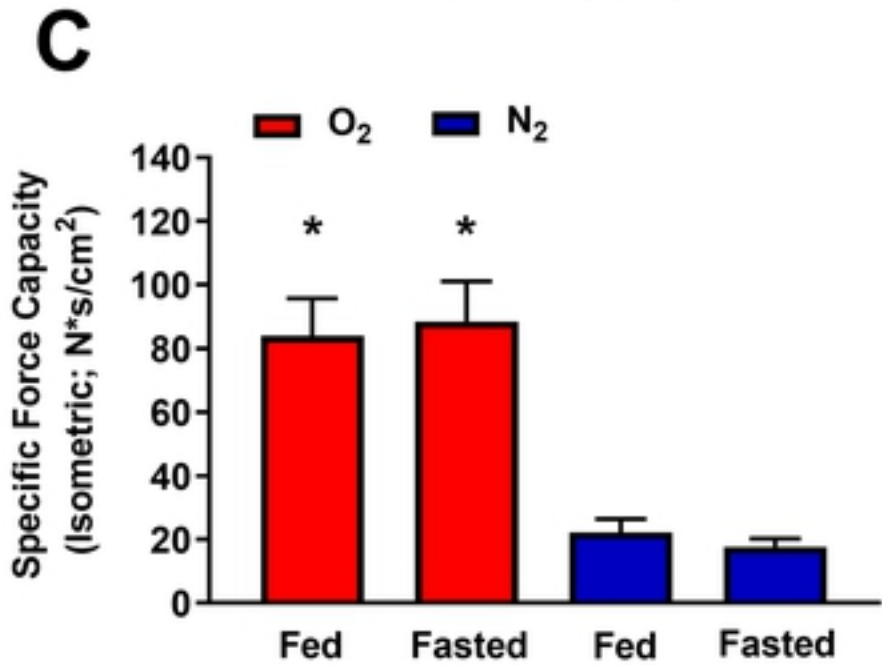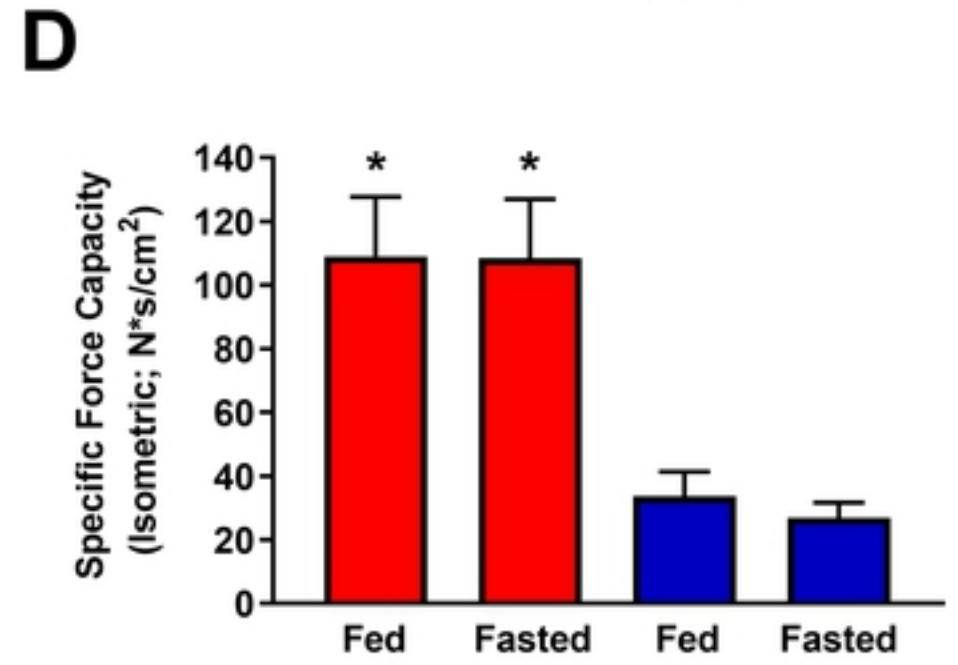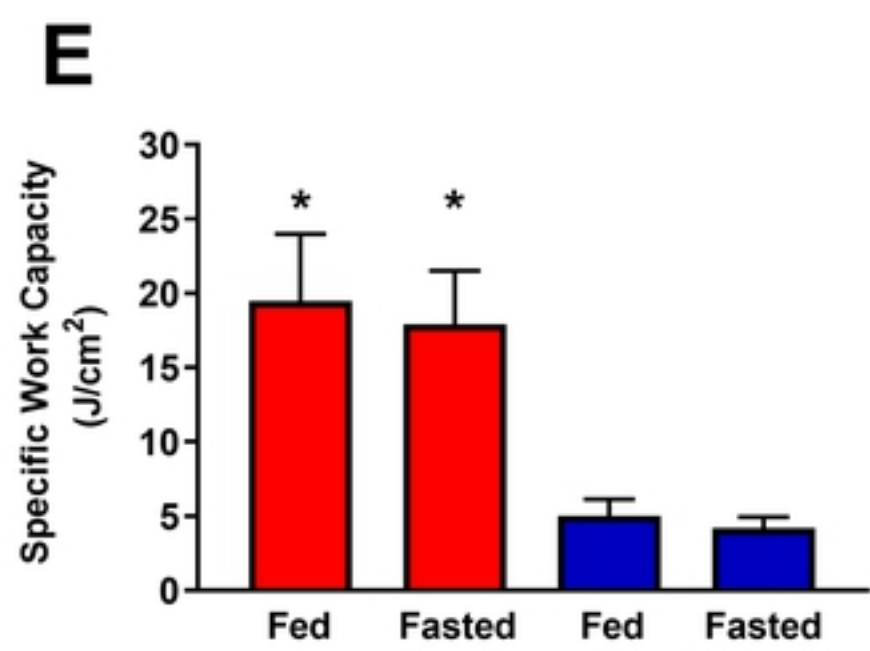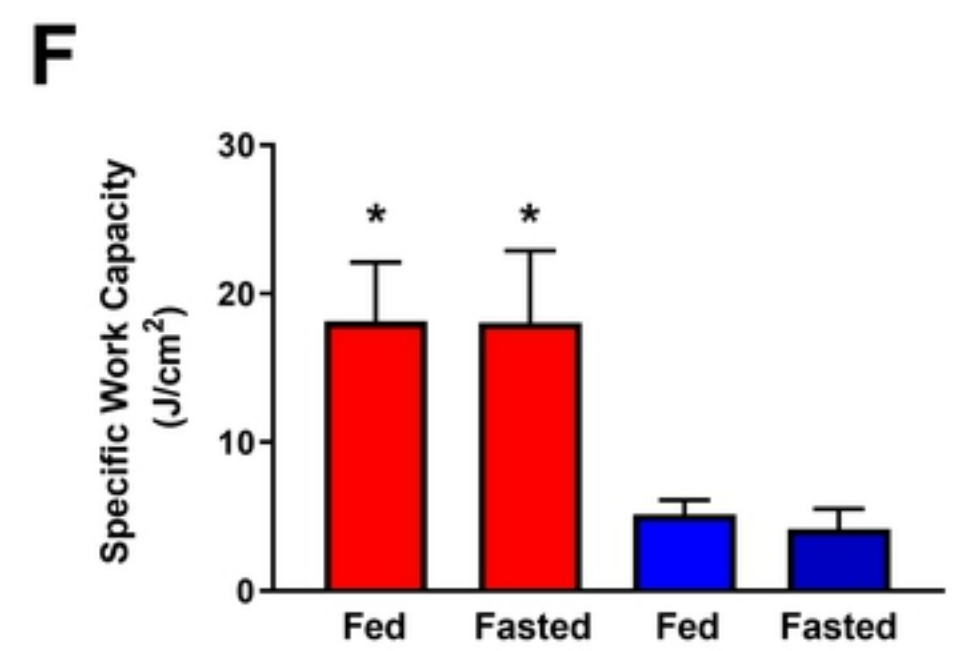

bioRxiv preprint doi: <https://doi.org/10.1101/846774>; this version posted November 18, 2019. The copyright holder for this preprint (which was not certified by peer review) is the author/funder, who has granted bioRxiv a license to display the preprint in perpetuity. It is made available under aCC-BY 4.0 International license.

Figure 2

# EDL

# Soleus

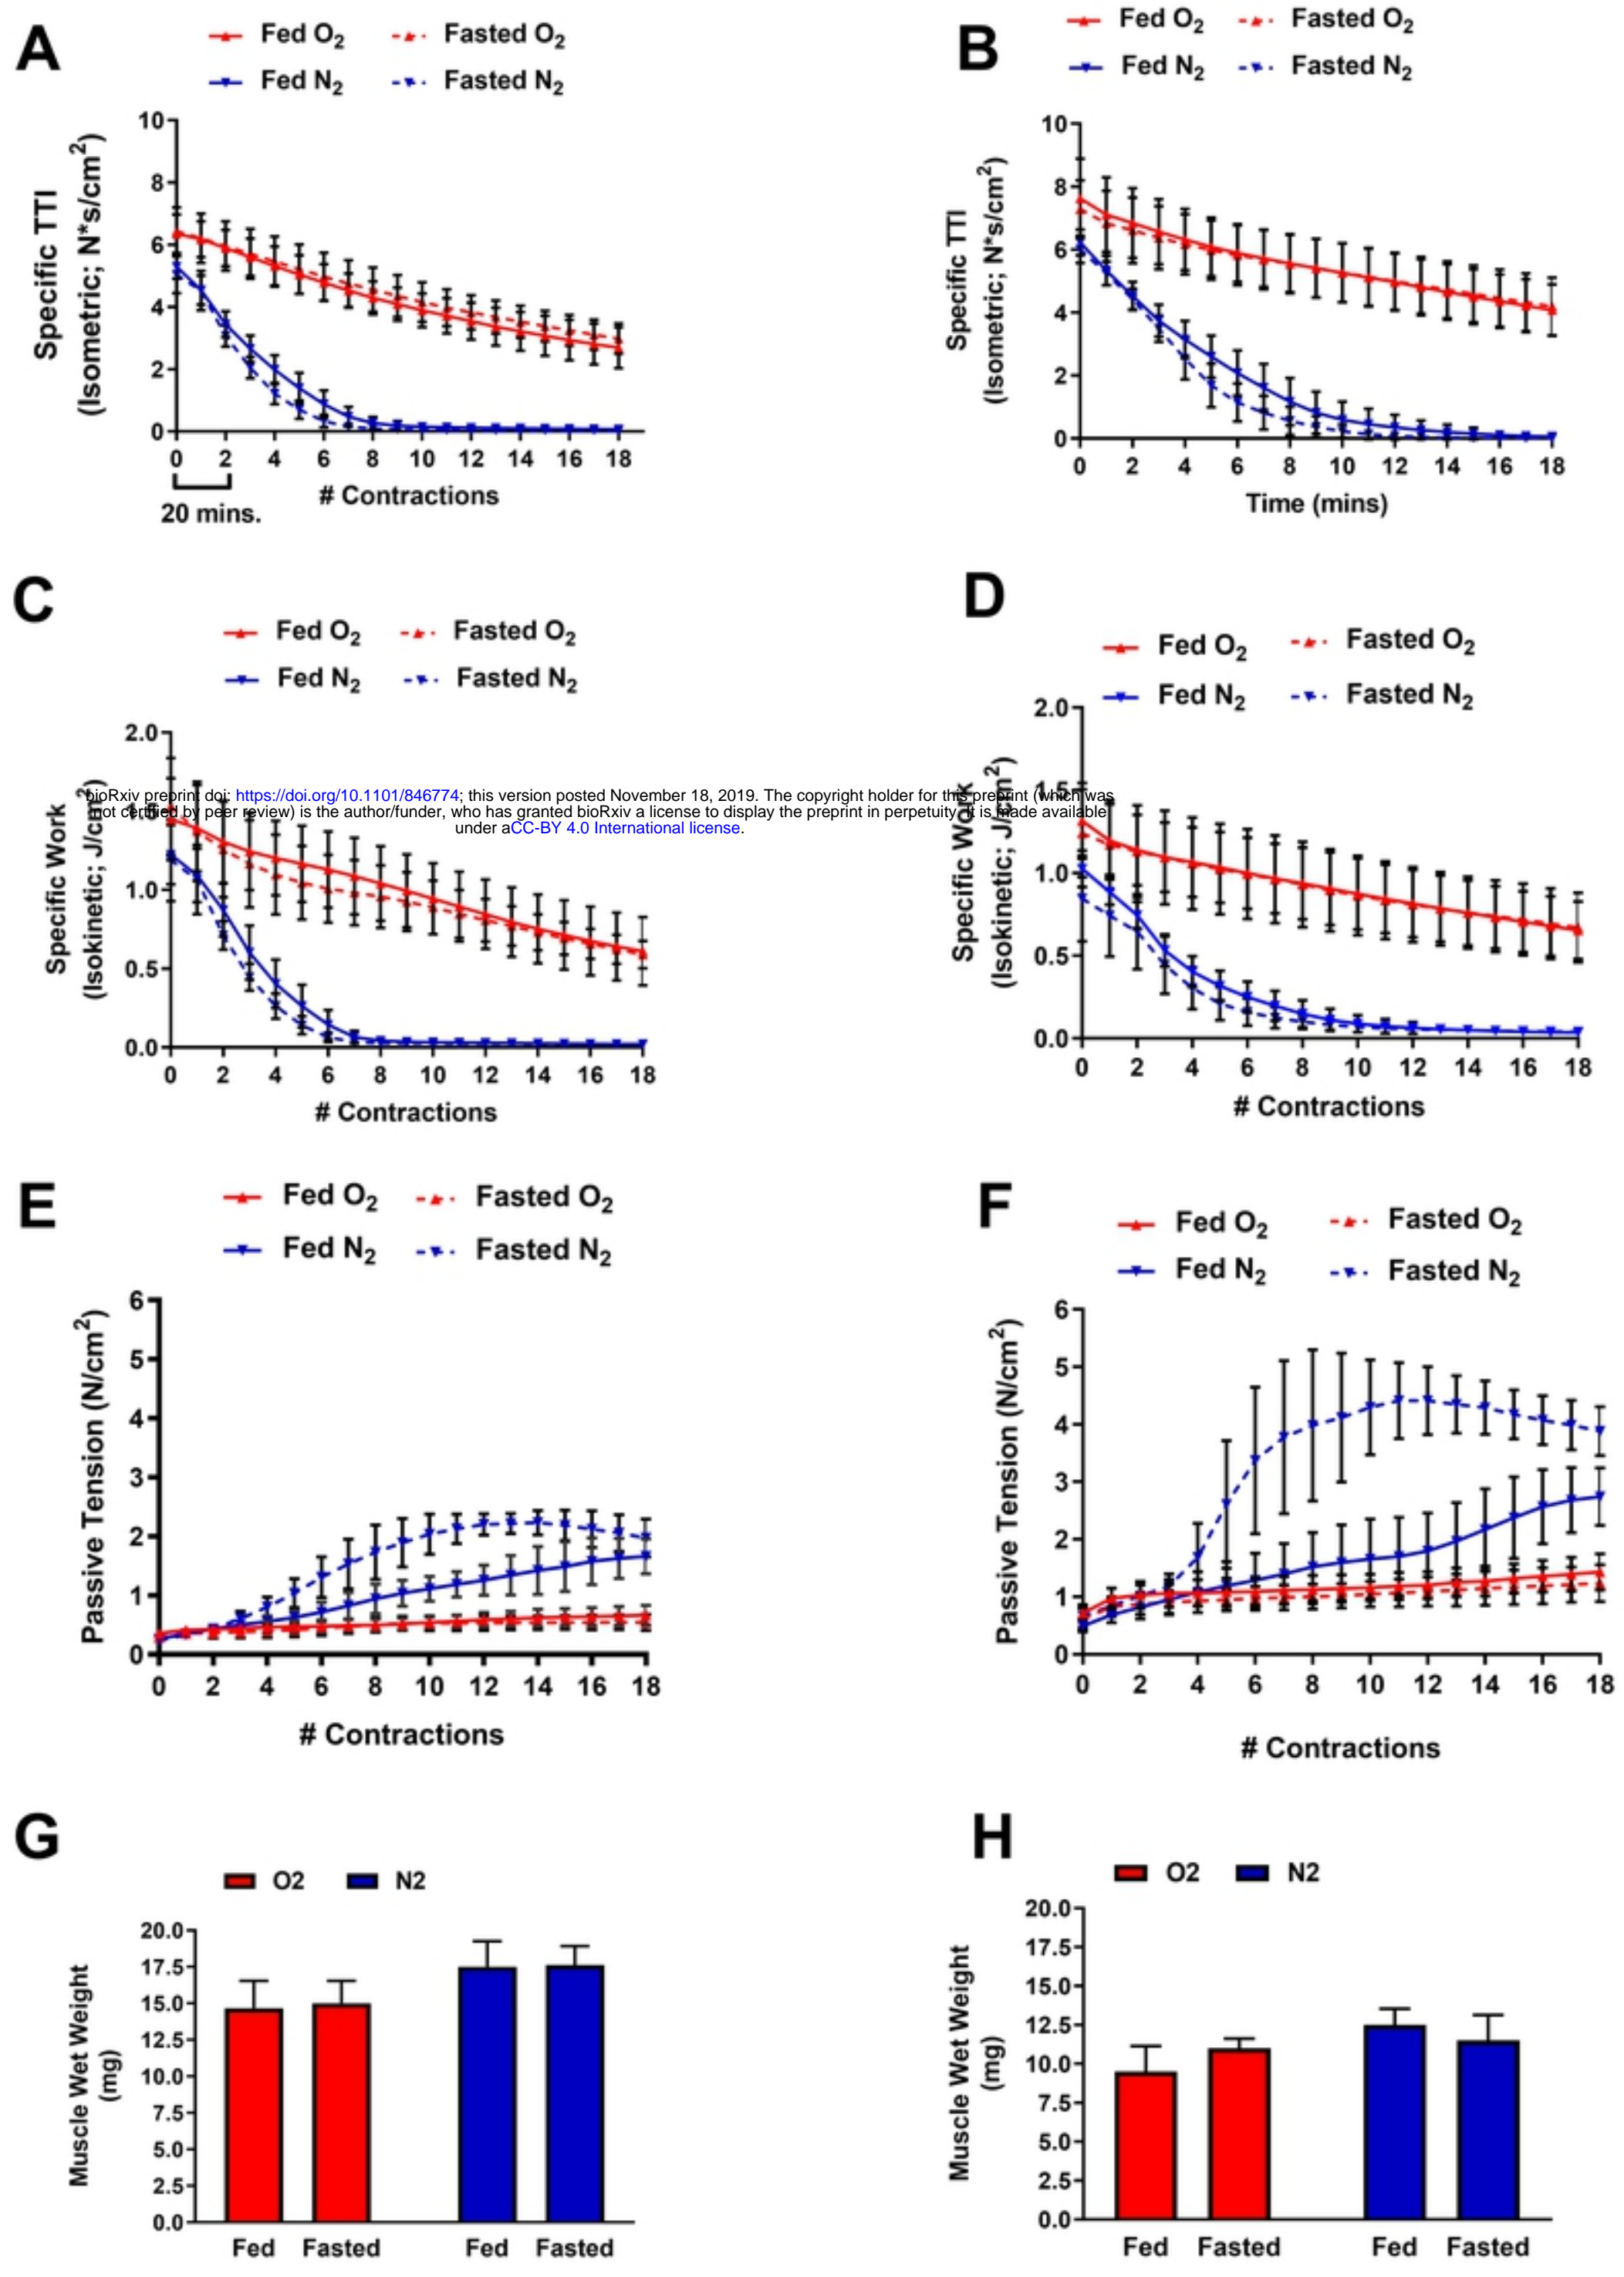

Figure 3

# EDL

# Soleus

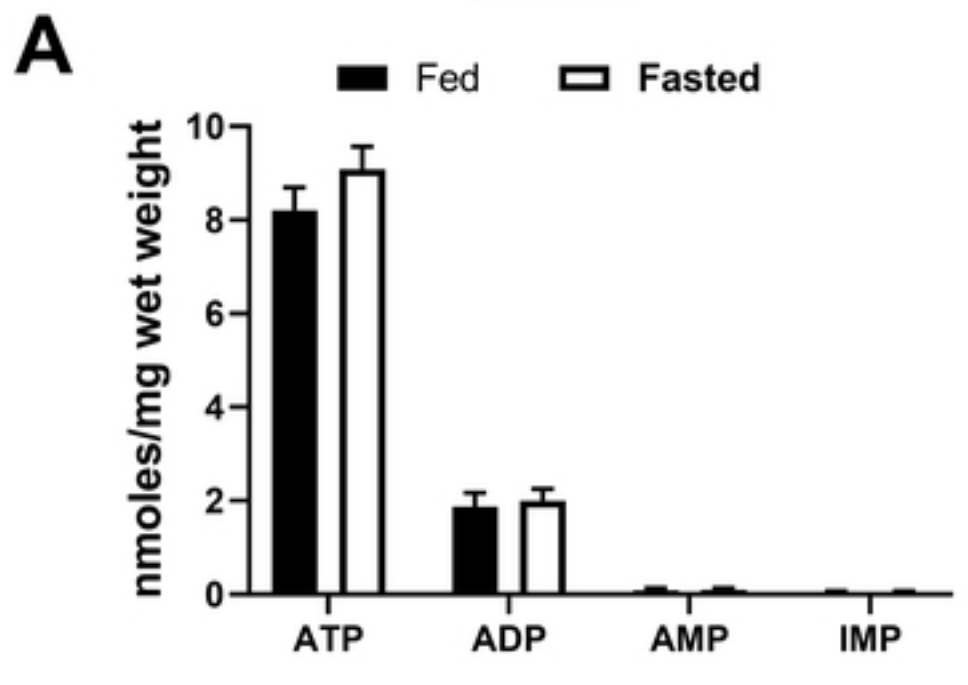

**B**

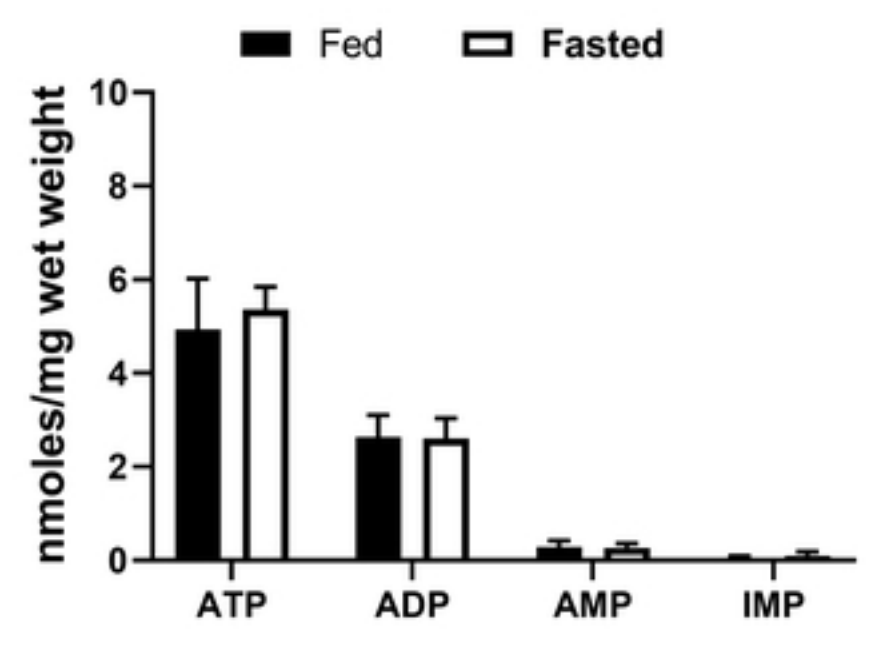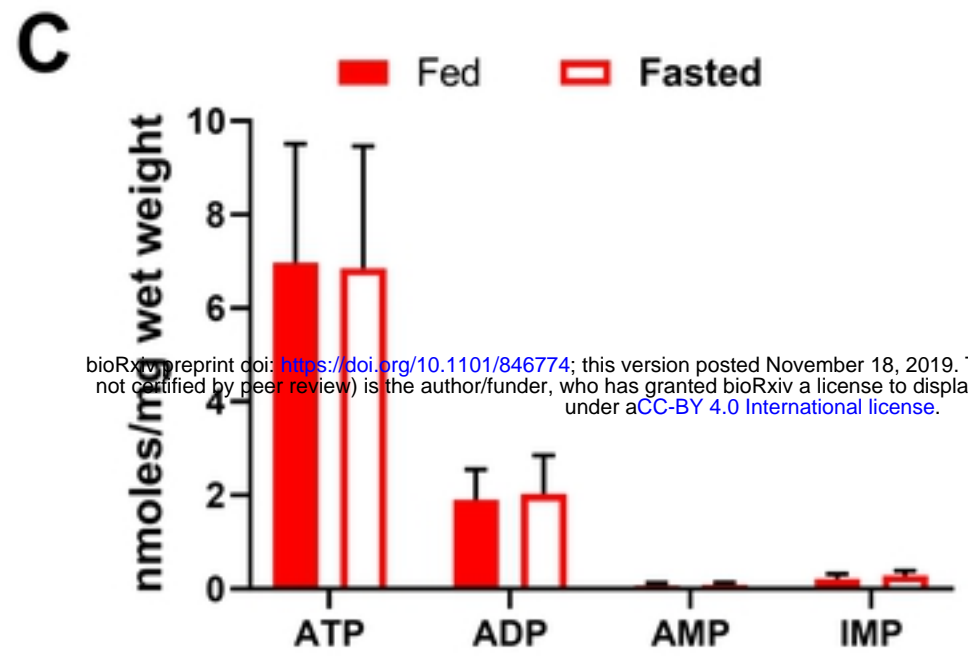

**D**

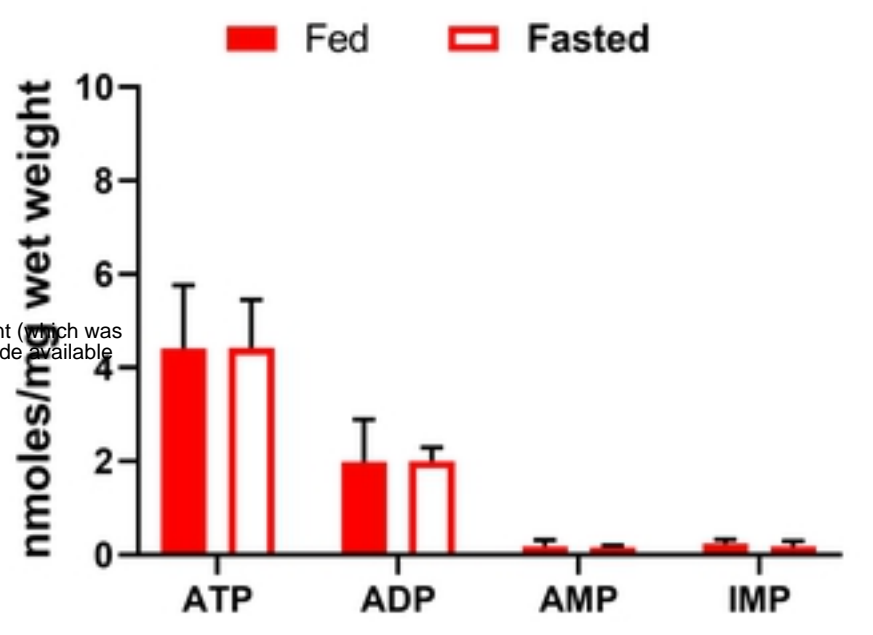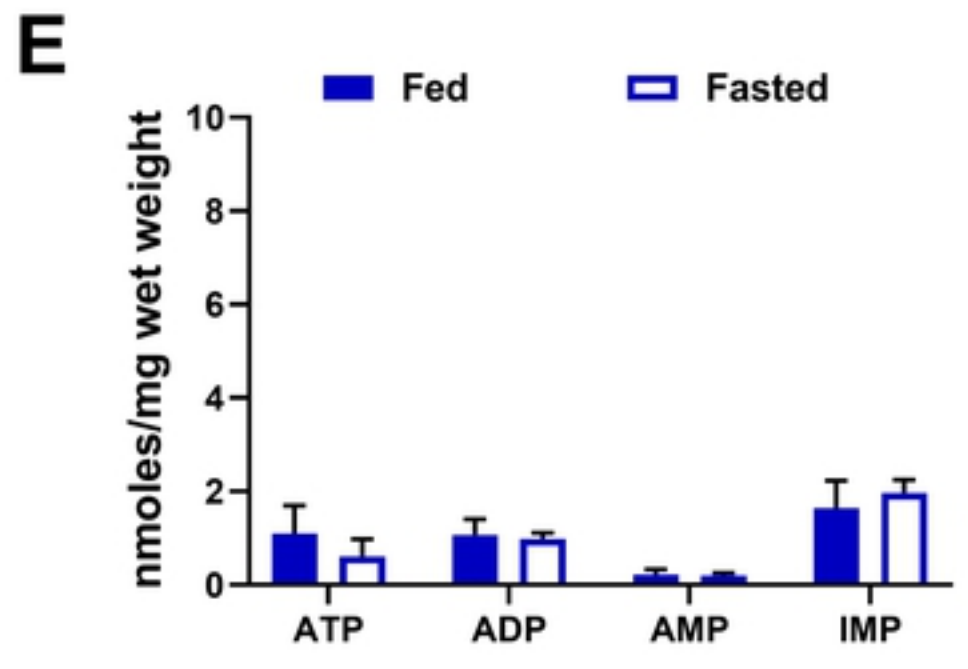

**F**

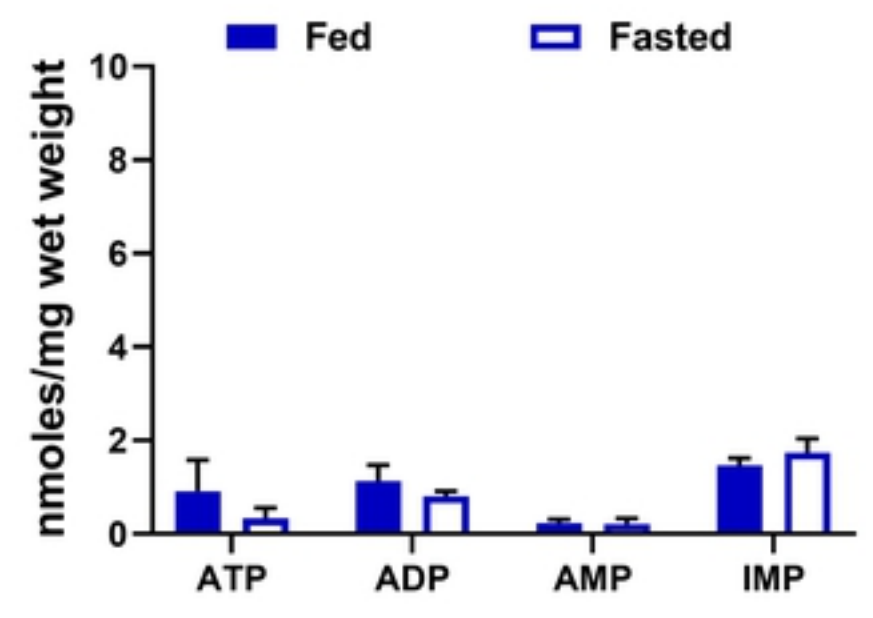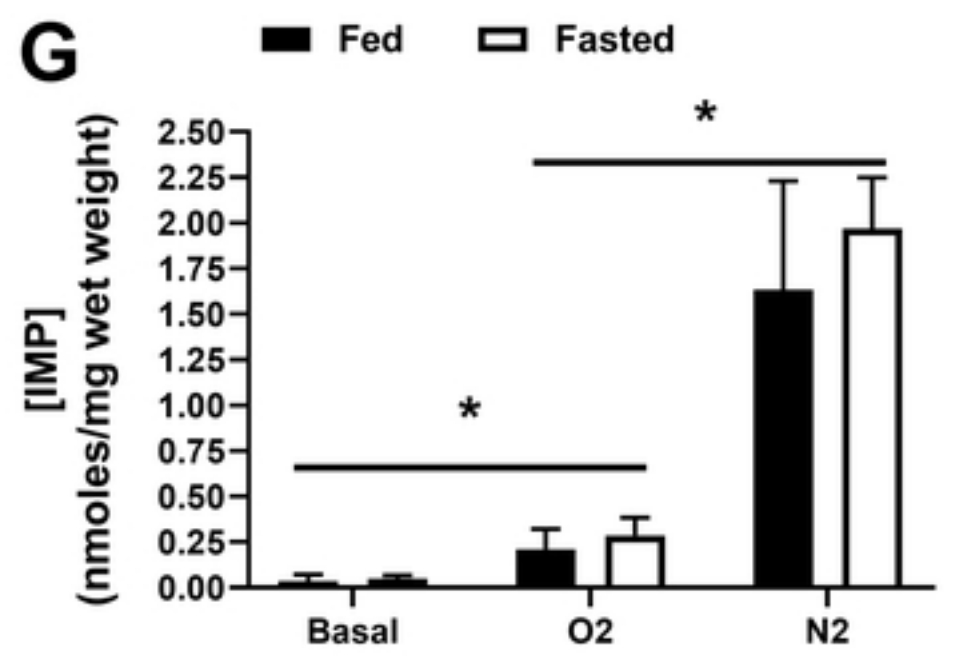

**H**

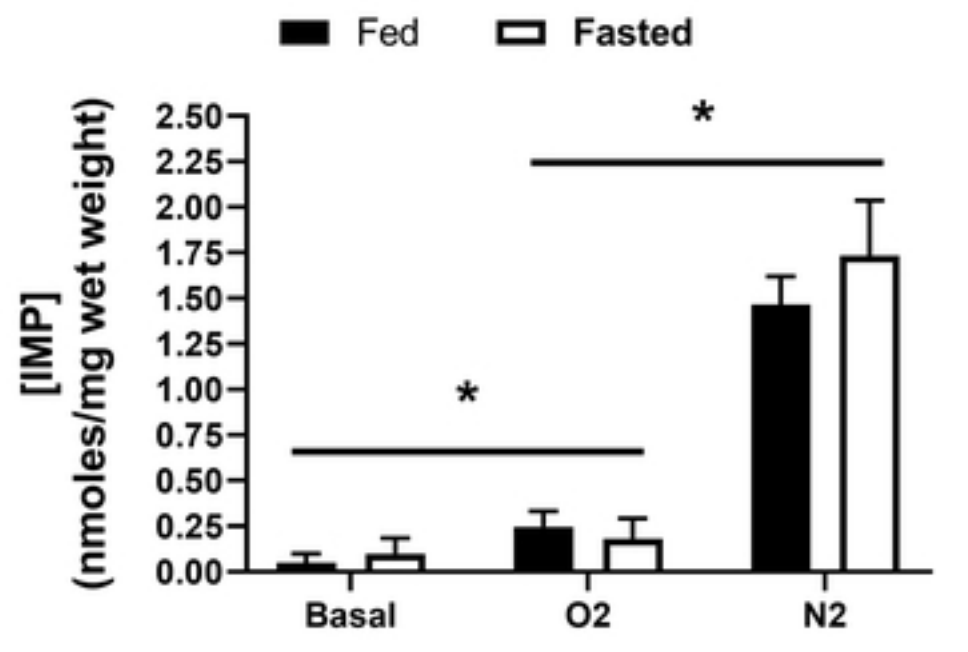

Figure 4

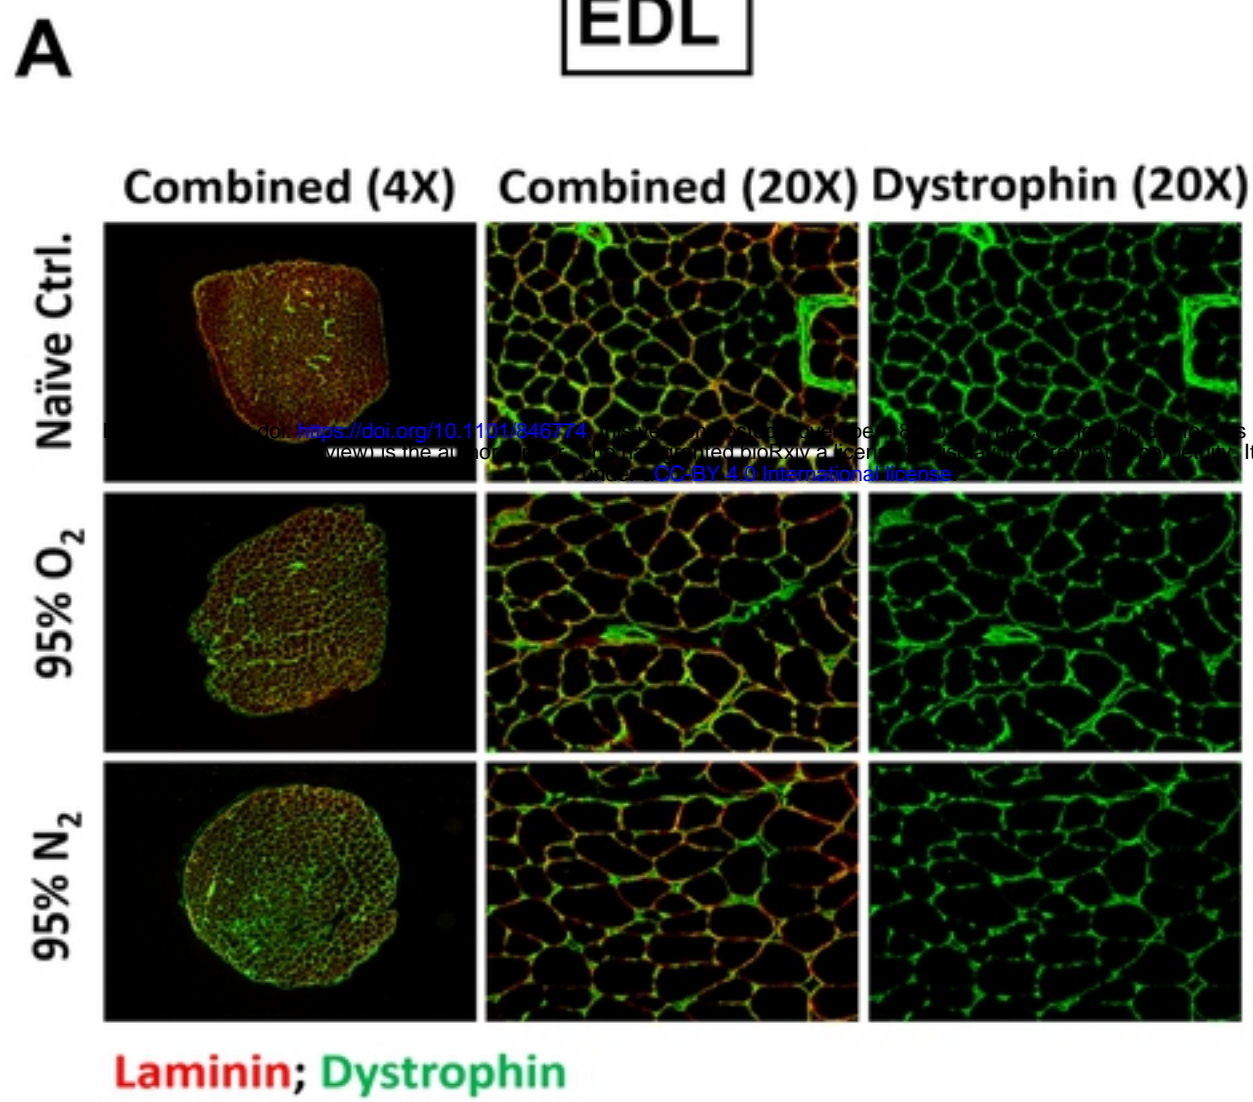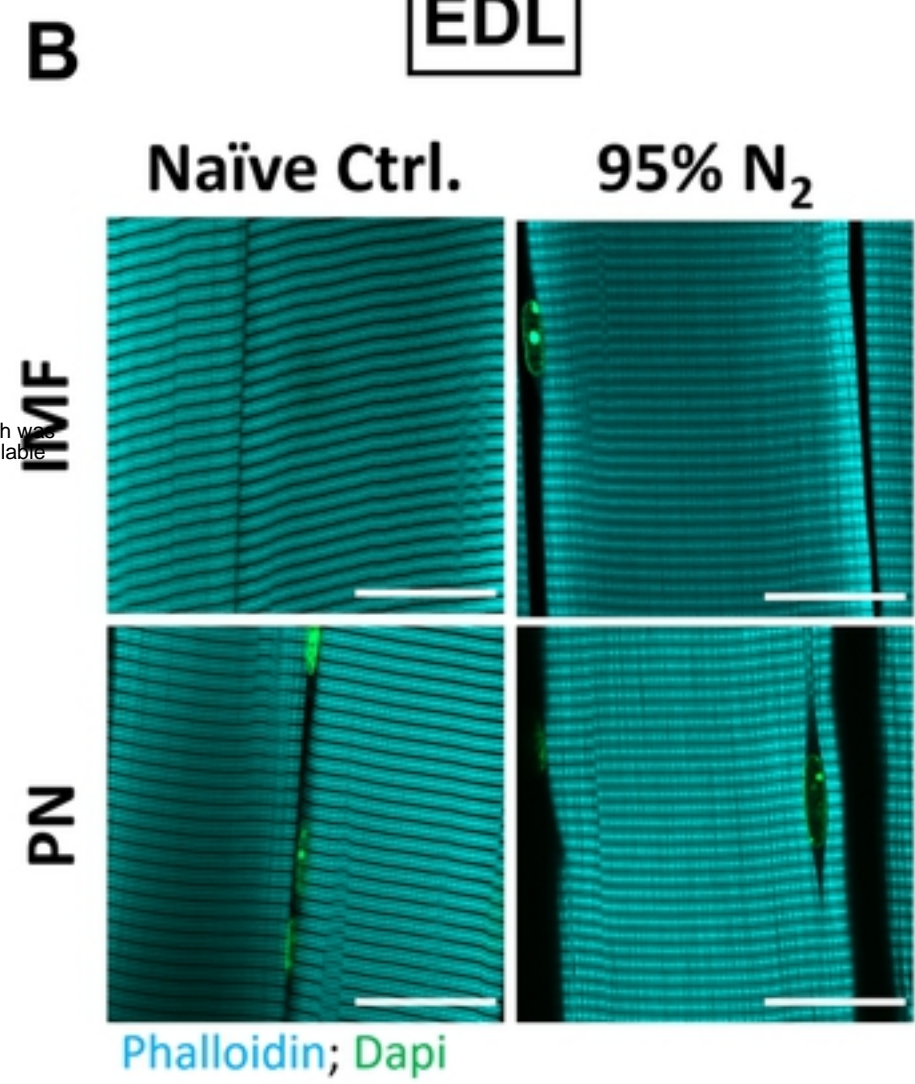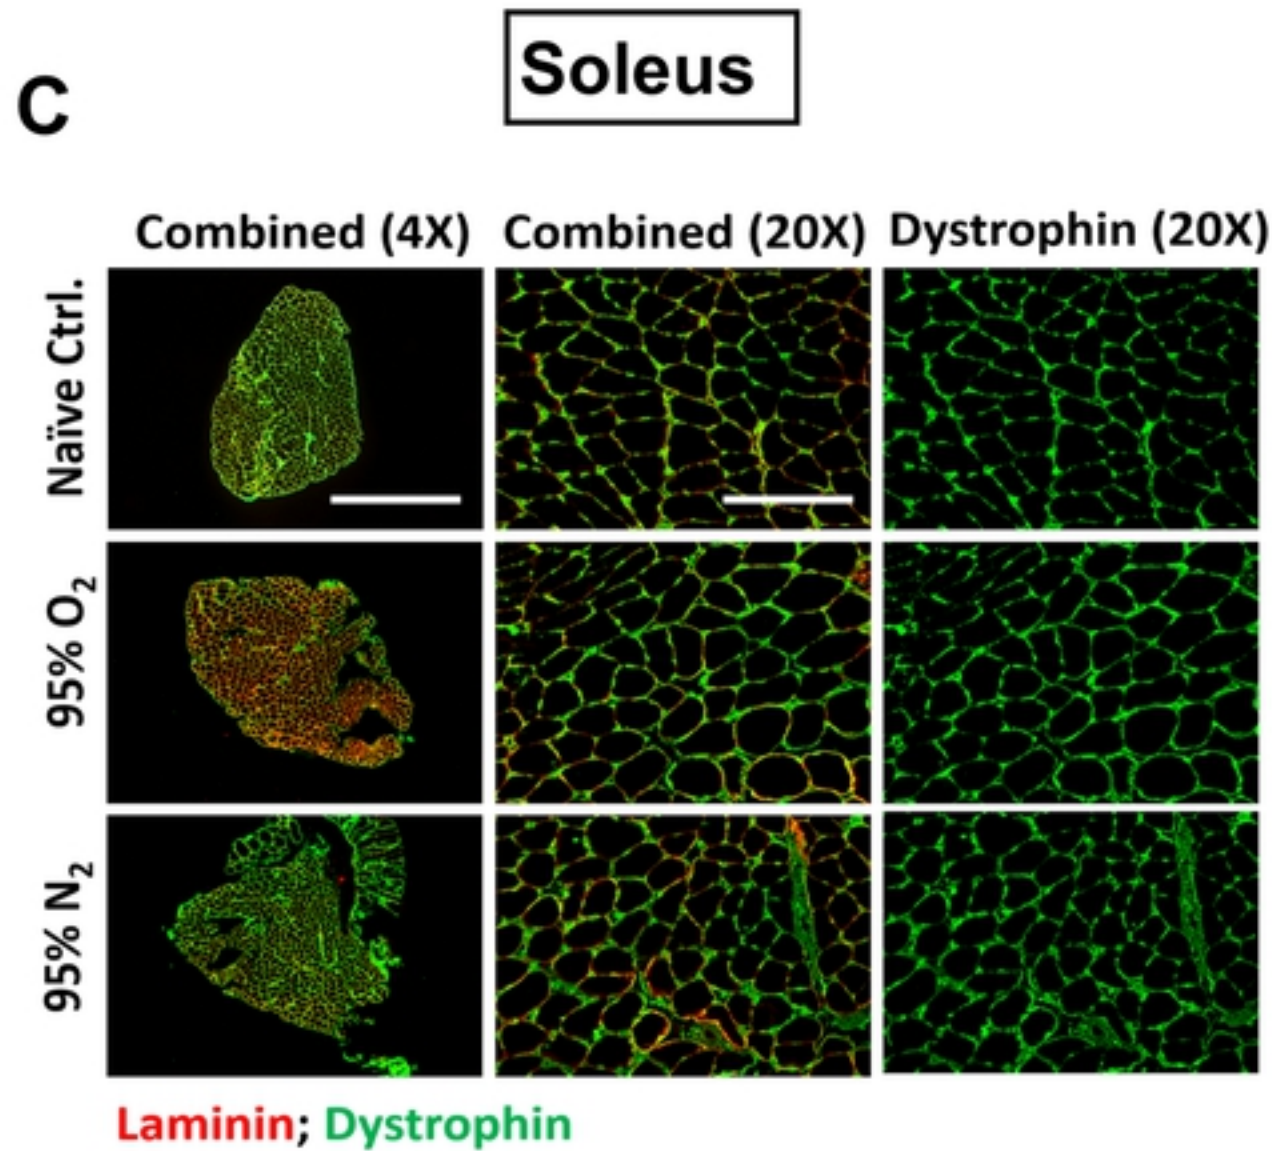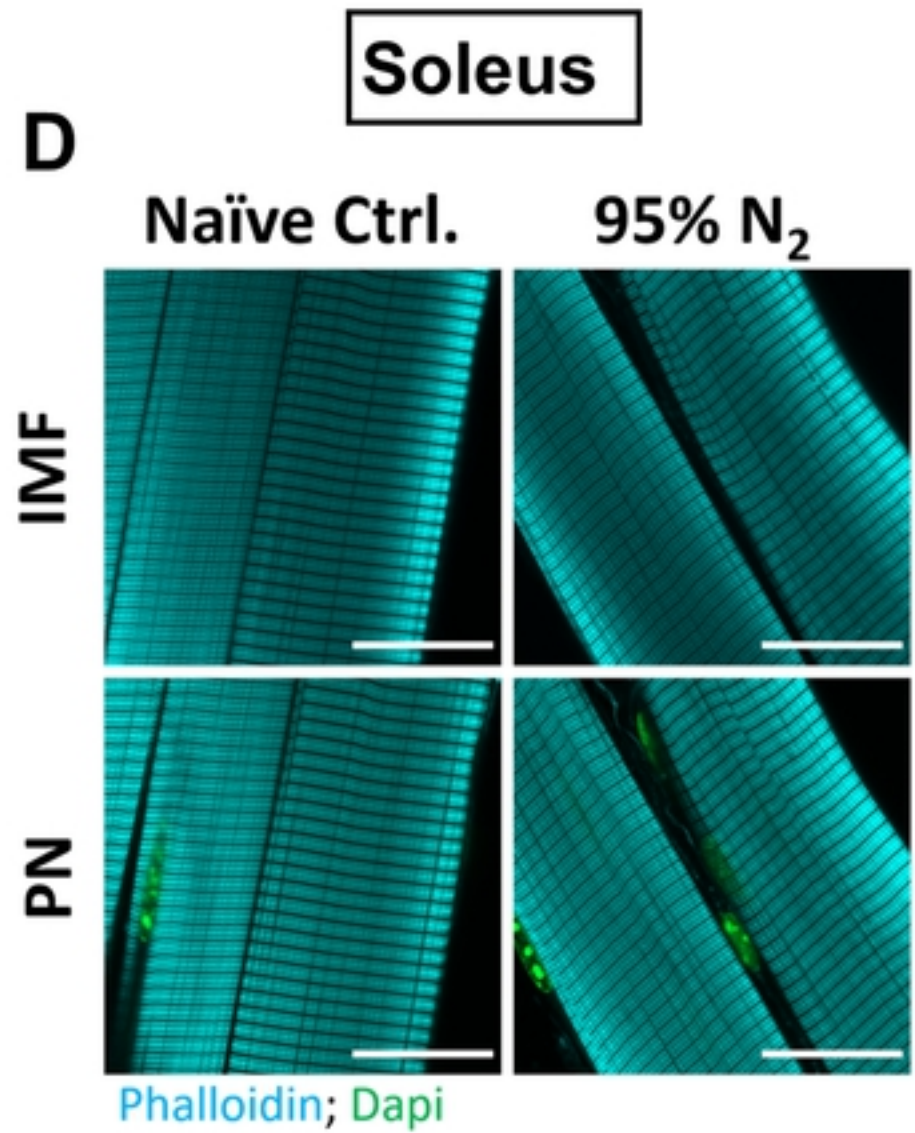

Figure 5
